# Supplementary material for: Differential Micro RNA Expression in PBMC from Multiple Sclerosis Patients
Source: PLoS One. 2009 Jul 20;4(7):e6309. doi: 10.1371/journal.pone.0006309 (PMC2708922; doi:10.1371/journal.pone.0006309)
Supplement: Table S4 — Complete data from the non-parametrical statistical analysis (0.15 MB XLS) [file pone.0006309.s004.xls]

## Sheet: SU analysis
B vs. NB		NB vs. C		B. vs NB-C		B-NB vs. C		B vs. C
miRNA	SU	miRNA	SU	miRNA	SU	miRNA	SU	miRNA	SU
hsa-miR-542-5p	0.527684	hsa-miR-96	0.48324	hsa-miR-652	0.447795	hsa-miR-599	0.341742	hsa-miR-599	0.86507	1
hsa-miR-376a	0.492094	hsa-miR-30a-5p	0.298911	hsa-miR-18b	0.415294	hsa-miR-96	0.312333	hsa-miR-18b	0.64161	2
hsa-miR-18b	0.404807	hsa-miR-30e-5p	0.295942	hsa-miR-520e	0.412439	hsa-miR-337	0.307859	hsa-miR-423	0.63671	3
hsa-miR-34c	0.403858	hsa-miR-599	0.295942	hsa-miR-214	0.378124	hsa-miR-30e-5p	0.292312	hsa-miR-125b	0.57381	4
hsa-miR-489	0.403858	hsa-miR-193a	0.295942	hsa-miR-554	0.375477	hsa-miR-383	0.247729	hsa-miR-383	0.53917	5
hsa-miR-554	0.403858	hsa-miR-337	0.295942	hsa-miR-599	0.373713	hsa-miR-423	0.245423	hsa-miR-509	0.53917	6
hsa-miR-600	0.403858	hsa-miR-449b	0.259079	hsa-miR-99b	0.335089	hsa-miR-184	0.238763	hsa-miR-30e-5p	0.53917	7
hsa-miR-652	0.403858	hsa-miR-184	0.247739	hsa-miR-411	0.329879	hsa-miR-127	0.219216	hsa-miR-487b	0.51674	8
hsa-miR-214	0.386253	hsa-miR-328	0.228342	hsa-miR-487b	0.311374	hsa-miR-148a	0.217972	hsa-miR-222	0.49696	9
hsa-miR-328	0.372928	hsa-miR-146b	0.223821	hsa-miR-125b	0.311164	hsa-miR-509	0.215748	hsa-miR-127	0.49651	10
hsa-miR-520h	0.365063	hsa-miR-383	0.223821	hsa-miR-423	0.303176	hsa-miR-629	0.2091	hsa-miR-214	0.47696	11
hsa-miR-126	0.365063	hsa-miR-542-5p	0.223821	hsa-miR	0.293005	hsa-miR-146b	0.208806	hsa-miR-148a	0.43964	12
hsa-miR-520e	0.365063	4343438-Blank	0.223821	hsa-miR-509	0.293005	hsa-miR-194	0.205588	hsa-miR-652	0.3932	13
hsa-miR-372	0.365063	hsa-miR-550	0.221439	hsa-miR-376a	0.282702	hsa-miR-449b	0.205512	hsa-miR-184	0.3932	14
hsa-miR-200a	0.365063	hsa-miR-646	0.221264	hsa-miR-155	0.273736	hsa-miR-506	0.196391	hsa-miR-146b	0.3932	15
hsa-miR-34b	0.365063	hsa-miR-362	0.221264	hsa-miR-7	0.273736	hsa-miR-500	0.196391	hsa-miR-204	0.3842	16
hsa-miR-137	0.365063	hsa-miR-133b	0.221264	hsa-miR-31	0.264129	hsa-miR-512-3p	0.196391	hsa-miR-29c	0.35794	17
hsa-miR-380-5p	0.365063	hsa-miR-330	0.218389	hsa-miR-148a	0.259125	hsa-miR-518b	0.182618	hsa-miR-19a	0.35374	18
hsa-miR-411	0.360276	hsa-miR-200c	0.218389	hsa-miR	0.259125	hsa-miR-642	0.174487	hsa-miR-520e	0.35374	19
hsa-miR-193a	0.352339	hsa-miR-149	0.216055	hsa-miR-213	0.259125	4343438-Blank	0.174487	hsa-miR-20b	0.35374	20
hsa-miR-206	0.352339	hsa-miR-500	0.20689	hsa-miR-204	0.258982	hsa-miR-125a	0.172727	hsa-miR-642	0.35374	21
hsa-miR-99b	0.347886	hsa-miR-506	0.20689	hsa-miR-544	0.243619	hsa-miR-550	0.172727	hsa-miR-301	0.35374	22
hsa-miR-422a	0.312492	hsa-miR-512-3p	0.20689	hsa-miR-586	0.243619	hsa-miR-597	0.171286	hsa-miR-374	0.35374	23
hsa-miR-409-5p	0.310895	hsa-miR-34a	0.20689	hsa-miR-553	0.243619	hsa-miR-149	0.170186	hsa-miR-576	0.35294	24
hsa-miR	0.30977	hsa-miR-659	0.20689	hsa-miR-549	0.243619	hsa-miR-222	0.169621	hsa-miR-181c	0.35294	25
hsa-miR-487b	0.301562	hsa-miR-629	0.200686	hsa-miR-548b	0.243619	hsa-miR-198	0.169076	hsa-miR	0.35294	26
hsa-miR-599	0.301562	hsa-miR-423	0.196546	hsa-miR-142-5p	0.243619	hsa-miR-520g	0.169076	hsa-miR-213	0.35294	27
hsa-miR-423	0.298411	hsa-miR-125a	0.196546	hsa-miR-588	0.243619	hsa-miR-520a	0.169076	hsa-miR-32	0.35158	28
hsa-let-7f	0.298411	hsa-miR-194	0.196546	hsa-miR-587	0.243619	hsa-miR-554	0.169076	hsa-miR-580	0.35158	29
hsa-miR-659	0.298411	hsa-miR-200a	0.192994	hsa-miR-657	0.243619	hsa-miR-331	0.167759	hsa-miR-125a	0.34842	30
hsa-miR-204	0.289023	hsa-miR-34c	0.192994	hsa-miR-658	0.243619	hsa-miR-30a-5p	0.167759	hsa-miR-369-3p	0.34842	31
hsa-miR-125b	0.289023	hsa-miR-489	0.192994	hsa-miR-376b	0.243619	hsa-miR-133a	0.161933	hsa-miR-554	0.34842	32
hsa-miR-135a	0.287429	hsa-miR-1	0.185961	hsa-miR-596	0.243619	hsa-miR-190	0.154573	hsa-miR-99b	0.34842	33
hsa-miR-218	0.287429	hsa-miR-15a	0.184553	hsa-miR-563	0.243619	hsa-miR-627	0.153372	hsa-miR-10b	0.34842	34
hsa-miR-382	0.275336	hsa-miR-410	0.184553	hsa-miR-555	0.243619	hsa-miR-99a	0.152863	hsa-miR-411	0.34842	35
hsa-miR-7	0.271601	hsa-miR-127	0.180238	hsa-miR-569	0.243619	hsa-miR-18b	0.152863	hsa-miR-99a	0.34353	36
hsa-miR-362	0.271601	hsa-miR-509	0.171212	hsa-miR-23b	0.243619	hsa-miR-10b	0.152303	hsa-miR-194	0.34353	37
hsa-miR-155	0.271601	hsa-miR-562	0.171212	hsa-miR-593	0.243619	hsa-miR-125b	0.148431	hsa-miR-146a	0.34353	38
hsa-miR-646	0.271601	hsa-miR-642	0.171212	hsa-miR-542-5p	0.237381	hsa-miR-562	0.14805	hsa-let-7f	0.33701	39
hsa-miR-135b	0.271601	hsa-miR-627	0.167474	hsa-miR-301	0.236675	hsa-miR-220	0.144779	hsa-miR-597	0.31784	40
hsa-miR-31	0.271601	hsa-miR-449	0.165406	hsa-miR-137	0.236675	hsa-miR-380-3p	0.144779	hsa-miR-147	0.29154	41
hsa-miR-494	0.267683	hsa-miR-594	0.161872	hsa-miR-374	0.236675	hsa-miR-325	0.144779	hsa-miR-325	0.29154	42
hsa-miR-213	0.267683	hsa-miR-148a	0.16184	hsa-miR-34b	0.236675	hsa-miR-491	0.144779	hsa-miR-29a	0.29154	43
hsa-miR	0.267683	hsa-miR-223	0.16184	hsa-miR-19a	0.236675	hsa-miR-208	0.144779	hsa-miR-208	0.29154	44
hsa-miR-93	0.267683	hsa-miR-93	0.159144	hsa-miR-20b	0.236675	hsa-miR-147	0.144779	hsa-miR	0.29154	45
hsa-miR-589	0.234361	hsa-miR-519e	0.157757	hsa-miR-380-5p	0.236675	hsa-miR-205	0.144779	hsa-miR-659	0.29154	46
hsa-miR-148a	0.234361	hsa-miR-492	0.157757	hsa-miR-126	0.236675	hsa-miR-517a	0.144634	hsa-miR-187	0.29154	47
hsa-miR-200c	0.22982	hsa-miR-520a	0.157757	hsa-miR-520h	0.236675	hsa-miR-515-5p	0.144634	hsa-miR-220	0.29154	48
hsa-miR-29c	0.22982	hsa-miR-520g	0.157757	hsa-miR-372	0.236675	hsa-miR-517b	0.144634	hsa-miR-380-3p	0.29154	49
hsa-miR-223	0.218121	hsa-miR-302c	0.157757	hsa-miR-222	0.224447	hsa-miR-339	0.144634	hsa-miR-491	0.29154	50
hsa-miR-509	0.218121	hsa-miR-33	0.157757	hsa-let-7f	0.220179	hsa-miR-520d	0.144634	hsa-miR-337	0.29154	51
hsa-miR-520d	0.215283	hsa-miR-493	0.157757	hsa-miR-220	0.215601	hsa-miR-520f	0.144634	hsa-miR-205	0.29154	52
hsa-miR-555	0.215283	hsa-miR-503	0.157757	hsa-miR-491	0.215601	hsa-miR-510	0.144634	hsa-miR-363	0.28614	53
hsa-miR-302c	0.215283	hsa-miR-206	0.157757	hsa-miR-380-3p	0.215601	hsa-miR-371	0.144634	hsa-miR-190	0.28614	54
hsa-miR-563	0.215283	hsa-miR-617	0.157757	hsa-miR-147	0.215601	hsa-miR-367	0.144634	hsa-miR-155	0.28614	55
hsa-miR-520c	0.215283	hsa-miR-196a	0.157757	hsa-miR-208	0.215601	hsa-miR-520c	0.144634	hsa-miR-7	0.28614	56
hsa-miR-626	0.215283	hsa-miR-198	0.157757	hsa-miR-205	0.215601	hsa-miR-520b	0.144634	hsa-let-7e	0.28266	57
hsa-miR-520b	0.215283	hsa-miR-518b	0.1536	hsa-miR-325	0.215601	hsa-miR-302d	0.144634	hsa-miR-23a	0.28245	58
hsa-miR-548b	0.215283	hsa-miR-429	0.1536	hsa-miR-589	0.215601	hsa-miR-302a	0.144634	hsa-miR-518b	0.28245	59
hsa-miR-549	0.215283	hsa-miR-133a	0.148148	hsa-miR-29c	0.214942	hsa-miR-521	0.144634	hsa-miR-422a	0.26428	60
hsa-miR-510	0.215283	hsa-miR-597	0.147539	hsa-miR-367	0.21146	hsa-miR-302c	0.144634	hsa-let-7d	0.26428	61
hsa-miR-544	0.215283	hsa-miR-148b	0.136965	hsa-miR-520b	0.21146	hsa-miR-217	0.144634	hsa-miR-31	0.26428	62
hsa-miR-521	0.215283	hsa-miR-190	0.136965	hsa-miR-518d	0.21146	hsa-miR-216	0.144634	hsa-miR-331	0.26428	63
hsa-miR-553	0.215283	hsa-miR-296	0.135618	hsa-miR-30e-3p	0.21146	hsa-miR-518d	0.144634	hsa-miR-203	0.26428	64
hsa-miR-515-5p	0.215283	hsa-miR-30d	0.135618	hsa-miR-633	0.21146	hsa-miR-518a	0.144634	hsa-miR-218	0.26334	65
hsa-miR-520f	0.215283	hsa-miR-143	0.134632	hsa-miR-302a	0.21146	hsa-miR-580	0.138949	hsa-miR-376a	0.26334	66
hsa-miR-217	0.215283	hsa-miR-331	0.134632	hsa-miR-521	0.21146	hsa-miR-410	0.138708	hsa-miR-486	0.26334	67
hsa-miR-216	0.215283	hsa-miR-99a	0.128092	hsa-miR-520c	0.21146	hsa-miR-19a	0.135596	hsa-miR-656	0.24642	68
hsa-miR-371	0.215283	hsa-miR-10b	0.128092	hsa-miR-520f	0.21146	hsa-miR-374	0.135596	hsa-miR-589	0.24642	69
hsa-miR-23b	0.215283	hsa-miR-100	0.128092	hsa-miR-520d	0.21146	hsa-miR-301	0.135596	hsa-miR-512-5p	0.21455	70
hsa-miR-593	0.215283	hsa-miR-382	0.123532	hsa-miR-216	0.21146	hsa-miR-20b	0.135596	hsa-miR-198	0.21455	71
hsa-miR-596	0.215283	hsa-miR-496	0.123532	hsa-miR-510	0.21146	hsa-miR-493	0.135596	hsa-miR-202	0.21455	72
hsa-miR-517b	0.215283	hsa-miR-199b	0.123532	hsa-miR-361	0.21146	hsa-miR-33	0.135596	hsa-miR-506	0.21455	73
hsa-miR-518d	0.215283	hsa-miR-197	0.117565	hsa-miR-339	0.21146	hsa-miR-617	0.135596	hsa-miR-512-3p	0.21455	74
hsa-miR-518c	0.215283	hsa-miR-515-3p	0.116743	hsa-miR-217	0.21146	hsa-miR-519e	0.135596	hsa-miR-122a	0.21455	75
hsa-miR-367	0.215283	hsa-miR-502	0.116743	hsa-miR-485-3p	0.21146	hsa-miR-492	0.135596	hsa-miR-510	0.21455	76
hsa-miR-339	0.215283	hsa-miR-511	0.116743	hsa-miR-517a	0.21146	hsa-miR-503	0.135596	hsa-miR-518d	0.21455	77
hsa-miR-518a	0.215283	hsa-miR-501	0.116683	hsa-miR-518a	0.21146	hsa-miR-487b	0.133464	hsa-miR-518a	0.21455	78
hsa-miR-658	0.215283	hsa-miR-551a	0.116683	hsa-miR-517b	0.21146	hsa-miR-146a	0.130049	hsa-miR-609	0.21455	79
hsa-miR-517a	0.215283	hsa-let-7c	0.116039	hsa-miR-27a	0.21146	hsa-miR-330	0.128126	hsa-miR-182	0.21455	80
hsa-miR-302d	0.215283	hsa-miR-656	0.116039	hsa-miR-515-5p	0.21146	hsa-miR-449	0.128126	hsa-miR-613	0.21455	81
hsa-miR-569	0.215283	hsa-miR-580	0.116039	hsa-miR-514	0.21146	hsa-miR-203	0.127673	hsa-miR-515-5p	0.21455	82
hsa-miR-657	0.215283	hsa-miR-342	0.116039	hsa-miR-566	0.21146	hsa-miR-200c	0.121532	hsa-miR-124a	0.21455	83
hsa-miR-302a	0.215283	hsa-miR-380-5p	0.114425	hsa-miR-371	0.21146	hsa-miR-214	0.118934	hsa-miR-517c	0.21455	84
hsa-miR-587	0.215283	hsa-miR-510	0.114425	hsa-miR-302c	0.21146	hsa-let-7e	0.116605	hsa-miR-517a	0.21455	85
hsa-miR-586	0.215283	hsa-miR-517a	0.114425	hsa-miR-302d	0.21146	hsa-miR-369-3p	0.116116	hsa-miR-517b	0.21455	86
hsa-miR-142-5p	0.215283	hsa-miR-518d	0.114425	hsa-miR-299-3p	0.205974	hsa-miR-34a	0.116116	hsa-miR-302a	0.21455	87
hsa-miR-588	0.215283	hsa-miR-520d	0.114425	hsa-miR-603	0.205974	hsa-miR-100	0.113784	hsa-miR-302b	0.21455	88
hsa-miR-376b	0.215283	hsa-miR-339	0.114425	hsa-miR-129	0.205974	hsa-miR-659	0.113784	hsa-miR-662	0.21455	89
hsa-miR-512-5p	0.211975	hsa-miR-520b	0.114425	hsa-miR-105	0.205974	hsa-miR-342	0.111775	hsa-miR-302a	0.21455	90
hsa-miR-514	0.211975	hsa-miR-520c	0.114425	hsa-miR-606	0.205974	hsa-miR-143	0.107649	hsa-miR-302d	0.21455	91
hsa-miR-205	0.211975	hsa-miR-34b	0.114425	hsa-miR-558	0.205974	hsa-miR-223	0.107555	hsa-miR-367	0.21455	92
hsa-miR-202	0.211975	hsa-miR-515-5p	0.114425	hsa-miR-517c	0.205974	hsa-miR-451	0.106385	hsa-miR-302b	0.21455	93
hsa-miR-517c	0.211975	hsa-miR-372	0.114425	hsa-miR-302a	0.205974	hsa-miR-29a	0.106385	hsa-miR-371	0.21455	94
hsa-miR-662	0.211975	hsa-miR-518a	0.114425	hsa-miR-302b	0.205974	hsa-let-7f	0.106204	hsa-miR-302c	0.21455	95
hsa-miR-30e-3p	0.211975	hsa-miR-518c	0.114425	hsa-miR-661	0.205974	hsa-miR-576	0.106204	hsa-miR-105	0.21455	96
hsa-miR-302c	0.211975	hsa-miR-517b	0.114425	hsa-miR-653	0.205974	hsa-miR-181c	0.106204	hsa-miR-647	0.21455	97
hsa-miR-380-3p	0.211975	hsa-miR-367	0.114425	hsa-miR-585	0.205974	hsa-miR-32	0.10616	hsa-miR-500	0.21455	98
hsa-miR-661	0.211975	hsa-miR-371	0.114425	hsa-miR-128b	0.205974	hsa-miR-363	0.10616	hsa-miR-644	0.21455	99
hsa-miR-325	0.211975	hsa-miR-302a	0.114425	hsa-miR-662	0.205974	hsa-miR-656	0.10616	hsa-miR-631	0.21455	100
hsa-miR-299-3p	0.211975	hsa-miR-554	0.114425	hsa-miR-512-5p	0.205974	hsa-miR-575	0.105206	hsa-miR-299-3p	0.21455	101
hsa-miR-361	0.211975	hsa-miR-626	0.114425	hsa-miR-647	0.205974	hsa-miR-624	0.104537	hsa-miR-661	0.21455	102
hsa-miR-27a	0.211975	hsa-miR-216	0.114425	hsa-miR-578	0.205974	hsa-miR-515-3p	0.104462	hsa-miR-216	0.21455	103
hsa-miR-147	0.211975	hsa-miR-302d	0.114425	hsa-miR-302b	0.205974	hsa-miR-502	0.104462	hsa-miR-653	0.21455	104
hsa-miR-491	0.211975	hsa-miR-302c	0.114425	hsa-miR-202	0.205974	hsa-miR-570	0.104425	hsa-miR-217	0.21455	105
hsa-miR-653	0.211975	hsa-miR-520h	0.114425	hsa-miR-182	0.205974	hsa-miR-652	0.104425	hsa-miR-129	0.21455	106
hsa-miR-128b	0.211975	hsa-miR-520f	0.114425	hsa-miR-613	0.205974	hsa-miR-552	0.104425	hsa-miR-329	0.21455	107
hsa-miR-129	0.211975	hsa-miR-600	0.114425	hsa-miR-608	0.205974	hsa-miR-345	0.103304	hsa-miR-607	0.21455	108
hsa-miR-208	0.211975	hsa-miR-217	0.114425	hsa-miR-609	0.205974	hsa-miR-133b	0.103304	hsa-miR-585	0.21455	109
hsa-miR-302b	0.211975	hsa-miR-126	0.114425	hsa-miR-124a	0.205974	hsa-miR-30d	0.103053	hsa-miR-578	0.21455	110
hsa-miR-220	0.211975	hsa-miR-521	0.114425	hsa-miR-122a	0.205974	hsa-miR-496	0.102813	hsa-miR-521	0.21455	111
hsa-miR-485-3p	0.211975	hsa-miR-137	0.114425	hsa-miR-548c	0.205974	hsa-let-7c	0.10153	hsa-miR-558	0.21455	112
hsa-miR-302b	0.211975	hsa-miR-575	0.113675	hsa-miR-631	0.205974	hsa-miR-15a	0.10153	hsa-miR-339	0.21455	113
hsa-miR-302a	0.211975	hsa-miR-451	0.113675	hsa-miR-607	0.205974	hsa-miR-376a	0.099084	hsa-miR-548c	0.21455	114
hsa-miR-182	0.211975	hsa-miR-624	0.112946	hsa-miR-218	0.204218	hsa-miR-520e	0.097288	hsa-miR-606	0.21455	115
hsa-miR-614	0.211975	hsa-miR-222	0.112946	hsa-miR-600	0.203764	hsa-miR-361	0.097288	hsa-miR-128b	0.21455	116
hsa-miR-631	0.211975	hsa-let-7f	0.112946	hsa-miR-29a	0.200156	hsa-miR-514	0.097288	hsa-miR-603	0.21455	117
hsa-miR-613	0.211975	hsa-miR-484	0.109675	hsa-miR-422a	0.190754	hsa-miR-633	0.097288	hsa-miR-520c	0.21455	118
hsa-miR-558	0.211975	hsa-miR-199a	0.10613	hsa-miR-383	0.188769	hsa-miR-27a	0.097288	hsa-miR-520b	0.21455	119
hsa-miR-124a	0.211975	hsa-miR-196b	0.095352	hsa-miR-659	0.188769	hsa-miR-566	0.097288	hsa-miR-520d	0.21455	120
hsa-miR-647	0.211975	hsa-miR-409-5p	0.094868	hsa-miR-32	0.181957	hsa-miR-485-3p	0.097288	hsa-miR-520a	0.21455	121
hsa-miR-615	0.211975	hsa-miR-380-3p	0.094868	hsa-miR-489	0.181485	hsa-miR-30e-3p	0.097288	hsa-miR-520f	0.21455	122
hsa-miR-122a	0.211975	hsa-miR-220	0.094868	hsa-miR-34c	0.181485	hsa-miR-148b	0.091056	hsa-miR-520g	0.21455	123
hsa-miR-548c	0.211975	hsa-miR-205	0.094868	hsa-miR-642	0.181485	hsa-miR-411	0.091034	hsa-miR-608	0.21455	124
hsa-miR-606	0.211975	hsa-miR-208	0.094868	hsa-miR-206	0.181485	hsa-miR	0.089859	hsa-miR-555	0.20862	125
hsa-miR-607	0.211975	hsa-miR-147	0.094868	hsa-miR-369-3p	0.17658	hsa-miR-199a	0.089859	hsa-miR-23b	0.20862	126
hsa-miR-585	0.211975	hsa-miR-491	0.094868	hsa-miR-146b	0.17658	hsa-miR-101	0.089859	hsa-miR-588	0.20862	127
hsa-miR-578	0.211975	hsa-miR-325	0.094868	hsa-let-7b	0.174116	hsa-miR-484	0.089859	hsa-miR-562	0.20862	128
hsa-miR-603	0.211975	hsa-miR-361	0.094002	hsa-miR-135a	0.171298	hsa-miR-213	0.089859	hsa-miR-552	0.20862	129
hsa-miR-105	0.211975	hsa-miR-518f	0.094002	hsa-miR-486	0.167586	hsa-miR-196b	0.089742	hsa-miR-96	0.20862	130
hsa-miR-633	0.211975	hsa-miR-519b	0.094002	hsa-miR-135b	0.167276	hsa-miR-429	0.089742	hsa-miR-485-3p	0.20862	131
hsa-miR-609	0.211975	hsa-miR-448	0.094002	hsa-miR-127	0.167276	hsa-miR-23a	0.089742	hsa-miR-361	0.20862	132
hsa-miR-566	0.211975	hsa-miR-485-3p	0.094002	hsa-miR-181c	0.164936	hsa-miR-224	0.085605	hsa-miR-553	0.20862	133
hsa-miR-608	0.211975	hsa-miR-30e-3p	0.094002	hsa-miR-576	0.164936	hsa-miR-381	0.085345	hsa-miR-596	0.20862	134
hsa-miR-23a	0.21168	hsa-miR-526b	0.094002	hsa-let-7d	0.164036	hsa-miR-489	0.085345	hsa-miR-376b	0.20862	135
hsa-miR-485-5p	0.21168	hsa-miR-518c	0.094002	hsa-miR-23a	0.164036	hsa-miR-34c	0.085345	hsa-miR-570	0.20862	136
hsa-miR-222	0.19678	hsa-miR-453	0.094002	hsa-miR-146a	0.160921	hsa-miR-452	0.085345	hsa-miR-30e-3p	0.20862	137
hsa-let-7d	0.19678	hsa-miR-374	0.094002	hsa-miR-363	0.160921	hsa-miR-29c	0.084548	hsa-miR-593	0.20862	138
hsa-let-7a	0.19678	hsa-miR-373	0.094002	hsa-miR-30e-5p	0.160921	hsa-miR-193a	0.082411	hsa-miR-587	0.20862	139
hsa-miR-486	0.189864	hsa-miR-522	0.094002	hsa-miR-17-3p	0.155702	hsa-miR-511	0.082411	hsa-miR-586	0.20862	140
hsa-miR-15a	0.189864	hsa-miR-524	0.094002	hsa-miR-126	0.155702	hsa-miR-196a	0.08163	hsa-miR-657	0.20862	141
hsa-miR-330	0.189864	hsa-miR-523	0.094002	hsa-miR-95	0.155702	hsa-miR-329	0.08163	hsa-miR-27a	0.20862	142
hsa-miR-20b	0.182197	hsa-miR-368	0.094002	hsa-miR-106b	0.155702	hsa-miR-192	0.080875	hsa-miR-563	0.20862	143
hsa-miR-196a	0.182197	hsa-miR-519c	0.094002	hsa-miR-19b	0.153886	hsa-miR-152	0.078948	hsa-miR-569	0.20862	144
hsa-miR-19a	0.182197	hsa-miR-373	0.094002	hsa-miR-335	0.153886	hsa-miR-644	0.077096	hsa-miR-658	0.20862	145
hsa-miR-594	0.182197	hsa-miR-633	0.094002	hsa-miR-660	0.153886	hsa-miR-99b	0.077096	hsa-miR-566	0.20862	146
hsa-miR-301	0.182197	hsa-miR-519d	0.094002	hsa-miR-485-5p	0.147448	hsa-miR-375	0.077096	hsa-miR-548b	0.20862	147
hsa-miR-374	0.182197	hsa-miR-514	0.094002	hsa-miR-494	0.143087	hsa-miR-422b	0.076111	hsa-miR-514	0.20862	148
hsa-miR-490	0.178638	hsa-miR-513	0.094002	hsa-miR-187	0.143087	hsa-miR-9	0.076111	hsa-miR-493	0.20862	149
hsa-miR-296	0.177319	hsa-miR-516-5p	0.094002	hsa-miR-223	0.143017	hsa-miR-639	0.075952	hsa-miR-142-5p	0.20862	150
hsa-miR-106b	0.168253	hsa-miR-27a	0.094002	hsa-miR-30c	0.143017	hsa-miR-501	0.075825	hsa-miR-544	0.20862	151
hsa-let-7b	0.168253	hsa-miR-20b	0.094002	hsa-miR-409-5p	0.139663	hsa-miR-187	0.075825	hsa-miR-617	0.20862	152
hsa-miR-96	0.168253	hsa-miR-507	0.094002	hsa-miR-422b	0.139344	hsa-miR-551a	0.075825	hsa-miR-503	0.20862	153
hsa-miR-126	0.168253	hsa-miR-566	0.094002	hsa-miR-134	0.139344	hsa-miR-95	0.074613	hsa-miR-33	0.20862	154
hsa-miR-29a	0.168253	hsa-miR-219	0.094002	hsa-miR-186	0.139344	hsa-miR-17-3p	0.074613	4343438-Blank	0.20862	155
hsa-miR-197	0.168253	hsa-miR-504	0.094002	hsa-miR-9	0.139344	hsa-miR-145	0.074009	hsa-miR-633	0.20862	156
hsa-miR-30c	0.168253	hsa-miR-570	0.094002	hsa-let-7e	0.13606	hsa-miR-1	0.074009	hsa-miR-492	0.20862	157
hsa-miR-618	0.168253	hsa-miR-505	0.094002	hsa-miR-326	0.135083	hsa-miR-328	0.074009	hsa-miR-549	0.20862	158
hsa-miR-215	0.160883	hsa-miR-552	0.094002	hsa-miR-30b	0.132651	hsa-miR-155	0.073888	hsa-miR-519e	0.20862	159
hsa-miR-32	0.160883	hsa-miR-19a	0.094002	hsa-miR-565	0.132651	hsa-miR-7	0.073888	hsa-miR-320	0.20431	160
hsa-miR-146b	0.160883	hsa-miR-488	0.094002	hsa-miR-451	0.132651	hsa-miR-551b	0.067137	hsa-miR-103	0.20431	161
hsa-miR-149	0.156078	hsa-miR-301	0.094002	hsa-miR-564	0.132651	hsa-miR-130a	0.067137	hsa-miR-342	0.2006	162
hsa-miR-299-5p	0.156078	hsa-miR-517	0.094002	hsa-miR-21	0.131553	hsa-miR-31	0.065337	hsa-miR-95	0.2006	163
hsa-miR-24	0.156078	hsa-miR-203	0.090079	hsa-miR-18a	0.131553	hsa-miR-142-3p	0.065337	hsa-let-7b	0.2006	164
hsa-miR-576	0.153655	hsa-miR-224	0.08785	hsa-miR-101	0.131553	hsa-let-7d	0.062357	hsa-miR-410	0.2006	165
hsa-miR-181c	0.153655	hsa-miR-601	0.08785	hsa-miR-30a-3p	0.131553	hsa-miR-204	0.061174	hsa-miR-17-3p	0.2006	166
hsa-miR-363	0.153655	hsa-miR-422a	0.084716	hsa-miR-382	0.128053	hsa-miR-296	0.061174	hsa-miR-449b	0.2006	167
hsa-miR-187	0.153655	hsa-miR-654	0.084716	hsa-miR-125a	0.126721	hsa-miR-486	0.059775	hsa-miR-494	0.18344	168
hsa-miR-132	0.145902	hsa-miR-152	0.084321	hsa-miR-580	0.126721	hsa-miR-373	0.057925	hsa-miR-532	0.18344	169
hsa-miR-320	0.145902	hsa-miR-615	0.083646	hsa-miR-320	0.126425	hsa-miR-376b	0.057925	hsa-miR-485-5p	0.18344	170
hsa-miR-103	0.145902	hsa-miR-381	0.083646	hsa-miR-103	0.126425	hsa-miR-219	0.057925	hsa-miR-345	0.18344	171
hsa-miR-183	0.145902	hsa-miR-614	0.083646	hsa-miR-328	0.122876	hsa-miR-555	0.057925	hsa-miR-324-5p	0.17344	172
hsa-miR-572	0.145902	hsa-miR-23a	0.08258	hsa-miR-99a	0.122252	hsa-miR-23b	0.057925	hsa-miR-132	0.17344	173
hsa-miR-125a	0.145902	hsa-miR-345	0.08258	hsa-miR-597	0.121438	hsa-miR-586	0.057925	hsa-miR-183	0.17344	174
hsa-miR-95	0.141171	hsa-miR-376a	0.082133	hsa-miR-132	0.115779	hsa-miR-563	0.057925	hsa-miR-135a	0.17344	175
hsa-miR-17-3p	0.141171	hsa-miR-338	0.082133	hsa-miR-183	0.115779	hsa-miR-569	0.057925	hsa-miR-629	0.17152	176
hsa-miR-1	0.141171	hsa-miR-199a	0.082133	hsa-miR-518e	0.114099	hsa-miR-368	0.057925	hsa-miR-135b	0.17152	177
hsa-miR-326	0.141171	hsa-miR-195	0.082133	hsa-miR-412	0.114099	hsa-miR-373	0.057925	hsa-miR-224	0.17152	178
hsa-miR-654	0.141171	hsa-miR-146a	0.082133	hsa-miR-10b	0.111968	hsa-miR-596	0.057925	hsa-miR-375	0.17029	179
hsa-miR-451	0.141171	hsa-miR-363	0.082133	hsa-miR-591	0.111968	hsa-miR-587	0.057925	hsa-miR-9	0.17029	180
hsa-miR-34a	0.140359	hsa-miR-125b	0.082133	hsa-miR-340	0.111968	hsa-miR-593	0.057925	hsa-miR-335	0.17029	181
hsa-miR-340	0.140359	hsa-miR-644	0.082133	hsa-miR-323	0.108838	hsa-miR-588	0.057925	hsa-miR-126	0.17029	182
hsa-miR-323	0.140359	hsa-miR-424	0.082133	hsa-let-7a	0.103692	hsa-miR-519c	0.057925	hsa-miR-372	0.17029	183
hsa-miR-642	0.140359	hsa-miR-452	0.082133	hsa-miR-331	0.103692	hsa-miR-488	0.057925	hsa-miR-520h	0.17029	184
hsa-miR-369-3p	0.140359	hsa-miR-490	0.082133	hsa-miR-299-5p	0.103692	hsa-miR-544	0.057925	hsa-miR-137	0.17029	185
hsa-miR-30b	0.140359	hsa-miR-639	0.082133	hsa-miR-532	0.10166	hsa-miR-519d	0.057925	hsa-miR-422b	0.17029	186
hsa-miR-335	0.140359	hsa-miR-101	0.079783	hsa-miR-203	0.100957	hsa-miR-548b	0.057925	hsa-miR-19b	0.17029	187
hsa-miR-565	0.140359	hsa-miR-618	0.077332	hsa-miR-149	0.100957	hsa-miR-448	0.057925	hsa-miR-550	0.17029	188
hsa-miR-134	0.140359	hsa-miR-494	0.077332	hsa-miR-196a	0.099931	hsa-miR-453	0.057925	hsa-miR-100	0.17029	189
hsa-miR-660	0.140359	hsa-miR-649	0.077332	hsa-miR-200a	0.099931	hsa-miR-519b	0.057925	hsa-miR-451	0.17029	190
hsa-miR-101	0.140359	hsa-miR-200b	0.077332	hsa-miR-490	0.099025	hsa-miR-505	0.057925	hsa-miR-380-5p	0.17029	191
hsa-miR-199b	0.140359	hsa-miR-324-3p	0.07695	hsa-miR-452	0.099025	hsa-miR-504	0.057925	hsa-miR-34a	0.17029	192
hsa-miR-19b	0.140359	hsa-miR-497	0.076841	hsa-miR-215	0.096846	hsa-miR-507	0.057925	hsa-miR-196a	0.17029	193
hsa-miR-10a	0.140359	hsa-miR-376a	0.076841	hsa-miR-324-5p	0.096446	hsa-miR-522	0.057925	hsa-miR-34b	0.17029	194
hsa-miR-497	0.140359	hsa-miR-10a	0.076841	hsa-miR-200c	0.096446	hsa-miR-526b	0.057925	hsa-miR-660	0.17029	195
hsa-miR-186	0.140359	hsa-miR-192	0.071543	hsa-miR-337	0.092804	hsa-miR-513	0.057925	hsa-miR-452	0.1654	196
hsa-miR-591	0.140359	hsa-miR-142-3p	0.070471	hsa-miR-644	0.092804	hsa-miR-523	0.057925	hsa-miR-133a	0.16323	197
hsa-miR-511	0.133638	hsa-miR-9	0.070471	hsa-miR-24	0.090814	hsa-miR-524	0.057925	hsa-miR-145	0.16323	198
hsa-miR-412	0.133638	hsa-miR-365	0.070471	hsa-miR-518b	0.090814	hsa-miR-658	0.057925	hsa-miR-149	0.15442	199
hsa-miR-211	0.133638	hsa-miR-15b	0.069843	hsa-miR-650	0.090814	hsa-miR-516-5p	0.057925	hsa-miR-542-5p	0.15442	200
hsa-miR-189	0.133638	hsa-let-7a	0.069843	hsa-miR-194	0.086102	hsa-miR-517	0.057925	hsa-miR-627	0.15442	201
hsa-miR-518e	0.133638	hsa-miR-576	0.067656	hsa-miR-15a	0.08555	hsa-miR-518f	0.057925	hsa-miR-142-3p	0.15358	202
hsa-miR-649	0.131319	hsa-miR-181c	0.067656	hsa-miR-656	0.082833	hsa-miR-549	0.057925	hsa-miR-130a	0.15358	203
hsa-miR-30a-5p	0.131319	hsa-miR-323	0.066715	hsa-miR-93	0.082833	hsa-miR-553	0.057925	hsa-miR-551b	0.15358	204
hsa-miR-21	0.131319	hsa-miR-452	0.066715	hsa-miR-345	0.080246	hsa-miR-657	0.057925	hsa-miR-126	0.15358	205
hsa-miR-133b	0.131319	hsa-miR-369-3p	0.066715	hsa-miR-224	0.080246	hsa-miR-518c	0.057925	hsa-miR-624	0.15358	206
hsa-miR-9	0.131319	hsa-miR-329	0.066715	hsa-miR-329	0.079364	hsa-miR-142-5p	0.057925	hsa-miR-101	0.15358	207
hsa-miR-30a-3p	0.131319	hsa-miR-18b	0.066715	hsa-miR-615	0.079364	hsa-miR-362	0.055765	hsa-miR-106b	0.15358	208
hsa-miR-200b	0.131319	hsa-miR-375	0.066715	hsa-miR-614	0.079364	hsa-miR-646	0.055765	hsa-miR-186	0.13352	209
hsa-miR-9	0.131319	hsa-let-7e	0.066304	hsa-miR-190	0.078441	hsa-miR-378	0.053944	hsa-miR-134	0.13352	210
hsa-miR-564	0.131319	hsa-miR-32	0.058874	hsa-miR-133a	0.076056	hsa-miR-323	0.053477	hsa-let-7c	0.13352	211
hsa-miR-18a	0.131319	hsa-miR-9	0.056174	hsa-miR-449	0.074921	hsa-miR	0.053477	hsa-miR-200c	0.13352	212
hsa-miR-422b	0.131319	hsa-miR-422b	0.056174	hsa-miR-107	0.074169	hsa-miR-199a	0.053477	hsa-miR-223	0.13352	213
hsa-miR-452	0.125846	hsa-miR-29a	0.056174	hsa-miR-572	0.072982	hsa-miR-19b	0.053477	hsa-miR-340	0.13352	214
hsa-let-7e	0.125846	hsa-miR-411	0.056174	hsa-miR-330	0.072982	hsa-miR-195	0.053477	hsa-miR-639	0.13352	215
hsa-miR-127	0.124394	hsa-miR-551b	0.055918	hsa-miR-142-3p	0.068864	hsa-miR-660	0.053477	hsa-miR-564	0.13352	216
hsa-miR-650	0.124394	hsa-miR-450	0.055918	hsa-miR-193a	0.068402	hsa-miR-335	0.053477	hsa-miR-34c	0.13352	217
hsa-miR-601	0.110935	hsa-miR-487b	0.055918	hsa-miR-511	0.068402	hsa-miR-422a	0.052543	hsa-miR-489	0.13352	218
hsa-miR-383	0.110935	hsa-miR-130a	0.055918	hsa-miR-376a	0.068402	hsa-let-7b	0.051817	hsa-miR-376a	0.13352	219
hsa-miR-28	0.110935	hsa-miR-187	0.055918	hsa-miR-296	0.067461	hsa-miR-630	0.051603	hsa-miR-591	0.13352	220
hsa-miR-146a	0.110935	hsa-miR-210	0.051732	hsa-miR-519e	0.067171	hsa-miR-532	0.051028	hsa-miR-330	0.13352	221
hsa-miR-449	0.110935	hsa-miR-145	0.051732	hsa-miR-302c	0.067171	hsa-miR-199b	0.050722	hsa-miR-630	0.13342	222
hsa-miR-532	0.106308	hsa-miR-98	0.051732	hsa-miR-503	0.067171	hsa-miR-565	0.050722	hsa-miR-192	0.13342	223
hsa-miR-597	0.106308	hsa-miR-29c	0.044943	hsa-miR-493	0.067171	hsa-miR-30b	0.050722	hsa-miR-449	0.13342	224
hsa-miR-224	0.106308	hsa-miR-191	0.044943	hsa-miR-198	0.067171	hsa-miR-324-5p	0.049751	hsa-miR-326	0.13207	225
hsa-miR-644	0.106308	hsa-miR-202	0.044943	hsa-miR-492	0.067171	hsa-miR-93	0.04747	hsa-miR-21	0.13207	226
hsa-miR-26a	0.10584	hsa-miR-24	0.044334	hsa-miR-520g	0.067171	hsa-miR-548d	0.04747	hsa-miR-496	0.13207	227
hsa-miR-153	0.10584	hsa-miR-425	0.044334	hsa-miR-617	0.067171	hsa-miR-608	0.04694	hsa-miR-18a	0.13207	228
hsa-miR-580	0.10584	hsa-miR-572	0.044334	hsa-miR-520a	0.067171	hsa-miR-607	0.04694	hsa-miR-30b	0.13207	229
hsa-miR-324-5p	0.10584	hsa-miR-25	0.042749	hsa-miR-33	0.067171	hsa-miR-613	0.04694	hsa-miR-30c	0.13207	230
hsa-miR-107	0.104749	hsa-miR-140	0.042749	hsa-miR-145	0.066686	hsa-miR-609	0.04694	hsa-miR-30a-3p	0.13207	231
hsa-miR-656	0.0990178	hsa-miR-378	0.042749	hsa-miR-26a	0.066686	hsa-miR-182	0.04694	hsa-miR-565	0.13207	232
hsa-miR-501	0.0990178	hsa-let-7d	0.042749	hsa-miR-184	0.064811	hsa-miR-128b	0.04694	hsa-miR-299-5p	0.1258	233
hsa-miR-551a	0.0990178	hsa-miR-92	0.042749	hsa-miR-189	0.064811	hsa-miR-129	0.04694	hsa-miR-650	0.1258	234
hsa-miR-30e-5p	0.0950248	hsa-miR-17-3p	0.035399	hsa-miR-211	0.064811	hsa-miR-137	0.04694	hsa-miR-548d	0.1214	235
hsa-miR-410	0.0950248	hsa-miR-214	0.035399	hsa-miR-410	0.062752	hsa-miR-653	0.04694	hsa-let-7a	0.1214	236
hsa-miR-98	0.0950248	hsa-miR-95	0.035399	hsa-miR-28	0.062752	hsa-miR-647	0.04694	hsa-miR-206	0.11747	237
hsa-miR-148b	0.0909127	hsa-miR-189	0.034022	hsa-miR-630	0.062752	hsa-miR-661	0.04694	hsa-miR-412	0.11747	238
hsa-miR-200a	0.0909127	hsa-miR-651	0.034022	hsa-miR-375	0.061505	hsa-miR-105	0.04694	hsa-miR-323	0.11747	239
hsa-miR-99a	0.0784747	hsa-miR-211	0.034022	hsa-miR-34a	0.061505	hsa-miR-202	0.04694	hsa-miR-518e	0.11747	240
hsa-miR	0.0784747	hsa-miR-548a	0.034022	hsa-miR-552	0.058142	hsa-miR-631	0.04694	hsa-miR-600	0.11747	241
hsa-miR-142-3p	0.0784747	hsa-miR-139	0.030562	hsa-miR-626	0.058142	hsa-miR-126	0.04694	hsa-miR-575	0.11747	242
hsa-miR-429	0.0784747	hsa-miR-324-5p	0.030562	hsa-miR-518c	0.058142	hsa-miR-662	0.04694	hsa-miR-215	0.11529	243
hsa-miR-579	0.0784747	hsa-miR-135a	0.030517	hsa-miR-570	0.058142	hsa-miR-122a	0.04694	hsa-miR-20a	0.09386	244
hsa-miR-324-3p	0.0784747	hsa-miR-215	0.030517	hsa-miR-548d	0.057721	hsa-miR-124a	0.04694	hsa-miR-378	0.09386	245
hsa-miR-622	0.0784747	hsa-miR-135b	0.030517	hsa-miR-185	0.057709	hsa-miR-585	0.04694	hsa-miR-182	0.09386	246
hsa-miR-516-5p	0.0772315	hsa-miR-151	0.030517	hsa-miR-153	0.05671	hsa-miR-380-5p	0.04694	hsa-miR-143	0.09386	247
hsa-miR-513	0.0772315	hsa-miR-486	0.029978	hsa-miR-579	0.055772	hsa-miR-372	0.04694	hsa-miR-196b	0.09386	248
hsa-miR-504	0.0772315	hsa-miR-630	0.029418	hsa-miR-342	0.055772	hsa-miR-603	0.04694	hsa-miR-185	0.09277	249
hsa-miR-488	0.0772315	hsa-miR-218	0.029418	hsa-miR-622	0.055772	hsa-miR-302b	0.04694	hsa-miR-107	0.09277	250
hsa-miR-507	0.0772315	hsa-miR-548d	0.029418	hsa-miR-654	0.053996	hsa-miR-548c	0.04694	hsa-miR-24	0.09277	251
hsa-miR-505	0.0772315	hsa-miR-28	0.029418	hsa-miR-618	0.053996	hsa-miR-302a	0.04694	hsa-miR-490	0.09093	252
hsa-miR-522	0.0772315	hsa-miR	0.028077	hsa-miR-130a	0.053996	hsa-miR-302b	0.04694	hsa-miR-545	0.08355	253
hsa-miR-519d	0.0772315	hsa-miR-213	0.028077	hsa-miR-551b	0.053996	hsa-miR-302c	0.04694	hsa-miR-152	0.08355	254
hsa-miR-526b	0.0772315	hsa-miR-193b	0.028077	hsa-miR-200a	0.053577	hsa-miR-512-5p	0.04694	hsa-miR-199a	0.0743	255
hsa-miR-523	0.0772315	hsa-miR-30c	0.028077	hsa-miR-182	0.051709	hsa-miR-520h	0.04694	hsa-miR-409-5p	0.0743	256
hsa-miR-524	0.0772315	hsa-miR-30b	0.026987	hsa-miR-362	0.051709	hsa-miR-34b	0.04694	hsa-miR-382	0.0743	257
hsa-miR-518c	0.0772315	hsa-miR-565	0.026987	hsa-miR-192	0.051709	hsa-miR-578	0.04694	hsa-miR-26a	0.07155	258
hsa-miR-517	0.0772315	hsa-miR	0.025686	hsa-miR-20a	0.051709	hsa-miR-517c	0.04694	hsa-miR-511	0.07155	259
hsa-miR-519c	0.0772315	hsa-miR-532	0.025686	hsa-miR-98	0.051709	hsa-miR-299-3p	0.04694	hsa-miR-379	0.06829	260
hsa-miR-518f	0.0772315	hsa-miR-153	0.023742	hsa-miR-646	0.051709	hsa-miR-606	0.04694	hsa-miR-381	0.06829	261
hsa-miR-519b	0.0772315	hsa-miR-545	0.023742	hsa-miR-627	0.050312	hsa-miR-558	0.04694	hsa-miR-296	0.06829	262
hsa-miR-373	0.0772315	hsa-miR-425-5p	0.023742	hsa-miR-629	0.046276	hsa-miR-338	0.046764	hsa-miR-614	0.06829	263
hsa-miR-373	0.0772315	hsa-miR-369-5p	0.023742	hsa-miR-501	0.046276	hsa-miR-424	0.046764	hsa-miR-615	0.06829	264
hsa-miR-448	0.0772315	hsa-let-7g	0.023742	hsa-miR-551a	0.046276	hsa-miR-589	0.046764	hsa-miR-616	0.06829	265
hsa-miR-219	0.0772315	hsa-miR-181b	0.023742	hsa-miR-545	0.045945	hsa-miR-594	0.046356	hsa-miR-515-3p	0.06244	266
hsa-miR-453	0.0772315	hsa-miR-660	0.015282	hsa-miR-639	0.044137	hsa-miR-30c	0.041027	hsa-miR-328	0.06244	267
hsa-miR-368	0.0772315	hsa-miR-508	0.015282	hsa-miR-199b	0.043938	hsa-miR-206	0.040712	hsa-miR-502	0.06244	268
hsa-miR-365	0.0741034	hsa-miR-335	0.015282	hsa-miR-197	0.04373	hsa-miR-490	0.040712	hsa-miR-93	0.06244	269
hsa-miR-10b	0.0741034	hsa-miR-19b	0.015282	hsa-miR-148b	0.042363	hsa-miR-452	0.040712	hsa-miR-579	0.05905	270
hsa-miR-203	0.0665343	hsa-miR-99b	0.015282	hsa-miR-379	0.039802	hsa-miR-140	0.038638	hsa-miR-141	0.05905	271
hsa-miR-331	0.0665343	hsa-miR-616	0.011732	hsa-miR-616	0.039802	hsa-miR-15b	0.038638	hsa-miR-654	0.05905	272
hsa-miR-450	0.0665343	hsa-miR-379	0.011732	hsa-miR-649	0.037363	hsa-miR-92	0.038638	hsa-miR-30a-5p	0.05905	273
hsa-miR-345	0.0665343	hsa-miR-204	0.011732	hsa-miR-200b	0.037363	hsa-miR-564	0.038358	hsa-miR-140	0.05905	274
hsa-miR-185	0.0665343	hsa-miR-16	0.010706	hsa-miR	0.037305	hsa-miR-382	0.036093	hsa-miR-425-5p	0.05905	275
hsa-miR-338	0.064219	hsa-miR-182	0.010706	hsa-miR-141	0.037305	hsa-miR-18a	0.036093	hsa-miR-30d	0.05905	276
hsa-miR-519e	0.064219	hsa-miR-26a	0.010706	hsa-miR-27b	0.036695	hsa-miR-30a-3p	0.036093	hsa-miR-98	0.05905	277
hsa-miR-33	0.064219	hsa-miR-20a	0.010706	hsa-miR-10a	0.036522	hsa-miR-365	0.036093	hsa-miR-92	0.05905	278
hsa-miR-329	0.064219	hsa-miR-26b	0.010428	hsa-miR-497	0.036522	hsa-miR-21	0.036093	hsa-miR-28	0.05905	279
hsa-miR-452	0.064219	hsa-miR-103	0.010428	hsa-miR-496	0.036522	hsa-miR-450	0.036093	hsa-miR-622	0.05905	280
hsa-miR-503	0.064219	hsa-miR-17-5p	0.010428	hsa-miR-450	0.035928	hsa-miR-134	0.035289	hsa-miR-27b	0.0549	281
hsa-miR-424	0.064219	hsa-miR-320	0.010428	hsa-miR-199a	0.035928	hsa-miR-186	0.035289	hsa-miR-572	0.0549	282
hsa-miR-617	0.064219	hsa-miR-200a	0.010428	hsa-miR-519d	0.035587	hsa-miR-542-5p	0.035289	hsa-miR-153	0.0549	283
hsa-miR-492	0.064219	hsa-miR-155	0.006762	hsa-miR-519b	0.035587	hsa-miR-324-3p	0.034546	hsa-miR-484	0.0549	284
hsa-miR-493	0.064219	hsa-miR-7	0.006762	hsa-miR-518f	0.035587	hsa-miR-494	0.034304	hsa-miR-200a	0.0549	285
hsa-miR-195	0.0497694	hsa-miR-564	0.006762	hsa-miR-373	0.035587	hsa-miR-126	0.03345	hsa-miR-189	0.03465	286
hsa-miR-616	0.0497694	hsa-let-7b	0.006762	hsa-miR-519c	0.035587	hsa-miR-326	0.03345	hsa-miR-211	0.03465	287
hsa-miR-627	0.0497694	hsa-miR-141	0.005404	hsa-miR-523	0.035587	hsa-miR-106b	0.03345	hsa-miR-15a	0.03465	288
4343438-Blank	0.0497694	hsa-miR-299-5p	0.005054	hsa-miR-526b	0.035587	hsa-miR-202	0.033417	hsa-miR-148b	0.03465	289
hsa-miR-199a	0.0497694	hsa-miR-183	0.005054	hsa-miR-524	0.035587	hsa-miR-191	0.033417	hsa-miR-202	0.02906	290
hsa-miR-518b	0.0497694	hsa-miR-130b	0.005054	hsa-miR-373	0.035587	hsa-miR-103	0.03336	hsa-miR-200a	0.02906	291
hsa-miR-379	0.0497694	hsa-miR-650	0.005054	hsa-miR-522	0.035587	hsa-miR-545	0.03336	hsa-miR-191	0.02906	292
hsa-miR-548d	0.0497694	hsa-miR-221	0.005054	hsa-miR-368	0.035587	hsa-miR-320	0.03336	hsa-miR-181d	0.02904	293
hsa-miR-199a	0.0497694	hsa-miR-132	0.005054	hsa-miR-453	0.035587	hsa-miR-425-5p	0.03196	hsa-miR-130b	0.02904	294
hsa-miR-145	0.0486649	hsa-miR-22	0.005054	hsa-miR-488	0.035587	hsa-miR-210	0.031377	hsa-miR-139	0.02904	295
hsa-miR-27b	0.0486649	hsa-miR-181d	0.005054	hsa-miR-516-5p	0.035587	hsa-miR-139	0.029166	hsa-miR-221	0.02904	296
hsa-miR-133a	0.0480351	hsa-miR-326	0.003697	hsa-miR-513	0.035587	hsa-miR-601	0.029166	hsa-miR-551a	0.02505	297
hsa-miR-376a	0.0480351	hsa-miR-485-5p	0.003038	hsa-miR-504	0.035587	hsa-miR-197	0.028479	hsa-miR-501	0.02505	298
hsa-miR-484	0.0480351	hsa-miR-185	0.003038	hsa-miR-219	0.035587	hsa-miR-654	0.028479	hsa-miR-450	0.02505	299
hsa-miR-545	0.044147	hsa-miR-27b	0.003038	hsa-miR-507	0.035587	hsa-let-7a	0.027893	hsa-miR-17-5p	0.02253	300
hsa-miR-630	0.044147	hsa-miR-107	0.003038	hsa-miR-505	0.035587	hsa-miR-182	0.027893	hsa-miR-646	0.02253	301
hsa-miR-182	0.044147	hsa-miR-126	0.002181	hsa-miR-517	0.035587	hsa-miR-98	0.027893	hsa-miR-425	0.02253	302
hsa-miR-20a	0.044147	hsa-miR-31	0.002181	hsa-miR-518c	0.035587	hsa-miR-20a	0.027893	hsa-miR-26b	0.02253	303
hsa-miR-342	0.044147	hsa-miR-106b	0.002181	hsa-miR-448	0.035587	hsa-miR-218	0.027893	hsa-miR-362	0.02253	304
hsa-miR-449b	0.044147	hsa-miR-18a	0.002181	hsa-miR-9	0.034784	hsa-miR-25	0.027893	hsa-miR-649	0.02253	305
hsa-miR-496	0.0406562	hsa-miR-21	0.002181	hsa-miR-506	0.033278	hsa-miR-425	0.026621	hsa-let-7g	0.02253	306
hsa-miR-639	0.0406562	hsa-miR-30a-3p	0.002181	hsa-miR-381	0.033278	hsa-miR-24	0.022685	hsa-miR-200b	0.02253	307
hsa-miR-375	0.0406562	hsa-miR-579	0.001838	hsa-miR-500	0.033278	hsa-let-7g	0.022685	hsa-miR-618	0.02253	308
hsa-miR-130a	0.038526	hsa-miR-556	0.001838	4343438-Blank	0.033278	hsa-miR-183	0.020299	hsa-miR-429	0.02253	309
hsa-miR-141	0.038526	hsa-miR-622	0.001838	hsa-miR-512-3p	0.033278	hsa-miR-132	0.020299	hsa-miR	0.02253	310
hsa-miR-143	0.038526	hsa-miR-186	0.001276	hsa-miR-452	0.033278	hsa-miR-193b	0.016594	hsa-miR-133b	0.02253	311
hsa-miR-551b	0.038526	hsa-miR-134	0.001276	hsa-miR-594	0.029327	hsa-miR-548a	0.016496	hsa-miR-645	0.01535	312
hsa-miR-192	0.0352424	hsa-miR-589	0.001276	hsa-miR-100	0.029327	hsa-miR-651	0.016496	hsa-miR-626	0.01535	313
hsa-miR-130b	0.0352424	hsa-miR-591	0.001114	hsa-miR-140	0.029261	hsa-miR-215	0.016198	hsa-miR-508	0.01535	314
hsa-miR-190	0.0352424	hsa-miR-340	0.001114	hsa-miR-601	0.029261	hsa-miR-151	0.016198	hsa-miR-199a	0.01535	315
hsa-miR-92	0.0352424	hsa-miR-124a	0.000633	hsa-miR-378	0.029261	hsa-miR-200b	0.015045	hsa-miR-302c	0.01535	316
hsa-miR-425	0.0352424	hsa-miR-122a	0.000633	hsa-miR-92	0.029261	hsa-miR-185	0.015045	hsa-miR-195	0.01535	317
hsa-miR-15b	0.0352424	hsa-miR-299-3p	0.000633	hsa-miR-449b	0.029261	hsa-miR-649	0.015045	hsa-miR-518c	0.01535	318
hsa-miR-140	0.0352424	hsa-miR-578	0.000633	hsa-miR-484	0.029154	hsa-miR-591	0.014683	hsa-miR-452	0.01535	319
hsa-miR-194	0.0352424	hsa-miR-653	0.000633	hsa-miR-365	0.029154	hsa-miR-340	0.014683	hsa-miR-210	0.01051	320
hsa-miR-381	0.0219599	hsa-miR-661	0.000633	hsa-miR-96	0.026002	hsa-miR-379	0.014683	hsa-miR-10a	0.01051	321
hsa-miR-570	0.0219599	hsa-miR-302b	0.000633	hsa-miR-143	0.025173	hsa-miR-616	0.014683	hsa-miR-556	0.01051	322
hsa-miR-552	0.0219599	hsa-miR-302a	0.000633	hsa-miR-130b	0.025173	hsa-miR-614	0.014671	hsa-miR-594	0.01051	323
hsa-miR-651	0.0219599	hsa-miR-662	0.000633	hsa-miR-624	0.024422	hsa-miR-200a	0.014671	hsa-miR-25	0.01051	324
hsa-miR-645	0.0219599	hsa-miR-558	0.000633	hsa-miR-324-3p	0.024422	hsa-miR-615	0.014671	hsa-miR-197	0.01051	325
hsa-miR-515-3p	0.0219599	hsa-miR-548c	0.000633	hsa-miR-338	0.021949	hsa-miR-412	0.014323	hsa-miR-497	0.01051	326
hsa-miR-502	0.0219599	hsa-miR-302b	0.000633	hsa-miR-424	0.021949	hsa-miR-508	0.014323	hsa-miR-324-3p	0.01051	327
hsa-miR-548a	0.0219599	hsa-miR-129	0.000633	hsa-miR-515-3p	0.021949	hsa-miR-518e	0.014323	hsa-miR-9	0.01051	328
hsa-miR-520a	0.0219599	hsa-miR-128b	0.000633	hsa-miR-195	0.021949	hsa-miR-141	0.014108	hsa-miR-1	0.01051	329
hsa-miR-520g	0.0219599	hsa-miR-609	0.000633	hsa-miR-502	0.021949	hsa-miR-135b	0.011353	hsa-miR-16	0.01051	330
hsa-miR-337	0.0219599	hsa-miR-613	0.000633	hsa-miR-199a	0.021949	hsa-miR-650	0.011353	hsa-miR-15b	0.01051	331
hsa-miR-198	0.0219599	hsa-miR-607	0.000633	hsa-miR-425-5p	0.021859	hsa-miR-369-5p	0.011353	hsa-miR-199b	0.00354	332
hsa-miR-181b	0.0185537	hsa-miR-608	0.000633	hsa-miR-575	0.016496	hsa-miR-181b	0.011353	hsa-miR-365	0.00354	333
hsa-miR-202	0.0185537	hsa-miR-512-5p	0.000633	hsa-miR-645	0.016343	hsa-miR-17-5p	0.011143	hsa-miR-193b	0.00354	334
hsa-miR-369-5p	0.0185537	hsa-miR-182	0.000633	hsa-miR-562	0.016343	hsa-miR-572	0.011143	hsa-miR-193a	0.00354	335
hsa-miR-191	0.0185537	hsa-miR-631	0.000633	hsa-miR-425	0.014307	hsa-miR-26b	0.011143	hsa-miR-601	0.00276	336
hsa-miR-210	0.0185537	hsa-miR-517c	0.000633	hsa-miR-196b	0.014307	hsa-miR-221	0.010301	hsa-miR-151	0.00276	337
hsa-miR-151	0.0161271	hsa-miR-518e	0.000633	hsa-miR-429	0.014307	hsa-miR-181d	0.010301	hsa-miR-22	0.00276	338
hsa-miR-100	0.0161271	hsa-miR-412	0.000633	hsa-miR-181d	0.014307	hsa-miR-16	0.010027	hsa-miR-369-5p	0.00276	339
hsa-miR-30d	0.0161271	hsa-miR-105	0.000633	hsa-miR-221	0.014307	hsa-miR-28	0.010027	hsa-miR-181b	0.00276	340
hsa-miR-556	0.0161271	hsa-miR-585	0.000633	hsa-miR-152	0.012012	hsa-miR-518c	0.008527	hsa-miR-651	0.00121	341
hsa-miR-17-5p	0.011107	hsa-miR-202	0.000633	hsa-miR-1	0.011272	hsa-miR-626	0.008527	hsa-miR-548a	0.00121	342
hsa-miR-624	0.011107	hsa-miR-647	0.000633	hsa-let-7c	0.010808	hsa-miR-10a	0.007848	hsa-miR-338	0.00121	343
hsa-miR-550	0.011107	hsa-miR-645	0.000633	hsa-miR-556	0.010808	hsa-miR-497	0.007848	hsa-miR-424	0.00121	344
hsa-miR-181d	0.011107	hsa-miR	0.000633	hsa-miR-191	0.010808	hsa-miR-409-5p	0.006843	hsa-miR-219	0	345
hsa-miR-378	0.011107	hsa-miR-606	0.000633	hsa-miR-202	0.010808	hsa-miR-107	0.006307	hsa-miR-368	0	346
hsa-miR-25	0.011107	hsa-miR-603	0.000633	hsa-miR-17-5p	0.010666	hsa-miR-618	0.006307	hsa-miR-373	0	347
hsa-miR-425-5p	0.011107	hsa-miR-555	0	hsa-miR-26b	0.010666	hsa-miR-27b	0.006307	hsa-miR-448	0	348
hsa-miR-26b	0.011107	hsa-miR-553	0	hsa-miR-22	0.004909	hsa-miR-9	0.005907	hsa-miR-373	0	349
hsa-miR-221	0.011107	hsa-miR-563	0	hsa-miR-139	0.004909	hsa-miR	0.005389	hsa-miR-526b	0	350
hsa-miR-22	0.011107	hsa-miR-23b	0	hsa-miR-15b	0.004909	hsa-miR-153	0.005389	hsa-miR-524	0	351
hsa-miR-193b	0.0107958	hsa-miR-520e	0	hsa-miR-550	0.004544	hsa-miR-485-5p	0.005389	hsa-miR-518f	0	352
hsa-miR-184	0.0107958	hsa-miR-376b	0	hsa-let-7g	0.003935	hsa-miR-130b	0.005135	hsa-miR-519b	0	353
hsa-miR-629	4.94e-16	hsa-miR-549	0	hsa-miR-369-5p	0.003935	hsa-miR-579	0.00289	hsa-miR-519c	0	354
hsa-miR-506	4.94e-16	hsa-miR-544	0	hsa-miR-181b	0.003935	hsa-miR-376a	0.00289	hsa-miR-519d	0	355
hsa-miR-508	4.94e-16	hsa-miR-548b	0	hsa-miR-30d	0.003935	hsa-miR-26a	0.00289	hsa-miR-523	0	356
hsa-miR-500	4.94e-16	hsa-miR-652	0	hsa-miR-508	0.002356	hsa-miR-622	0.00289	hsa-miR-522	0	357
hsa-miR-512-3p	4.94e-16	hsa-miR-596	0	hsa-miR-651	0.002356	hsa-miR-299-5p	0.002784	hsa-miR-504	0	358
hsa-miR-562	4.94e-16	hsa-miR-658	0	hsa-miR-548a	0.002356	hsa-miR-135a	0.001662	hsa-miR-505	0	359
hsa-miR-575	2.23e-16	hsa-miR-142-5p	0	hsa-miR-210	0.001583	hsa-miR-22	0.001662	hsa-miR-453	0	360
hsa-miR-152	1.77e-16	hsa-miR-657	0	hsa-miR-133b	0.001583	hsa-miR-556	0.001249	hsa-miR-488	0	361
hsa-miR-139	1.77e-16	hsa-miR-586	0	hsa-miR-16	0.001583	hsa-miR-211	0.001231	hsa-miR-517	0	362
hsa-miR-16	1.77e-16	hsa-miR-569	0	hsa-miR-151	0.001583	hsa-miR-189	0.001231	hsa-miR-518c	0	363
hsa-let-7g	1.77e-16	hsa-miR-593	0	hsa-miR-193b	0.000613	hsa-miR-645	0.000917	hsa-miR-507	0	364
hsa-let-7c	1.77e-16	hsa-miR-587	0	hsa-miR-30a-5p	0.000471	hsa-miR-600	0.000917	hsa-miR-516-5p	0	365
hsa-miR-196b	1.77e-16	hsa-miR-588	0	hsa-miR-25	0.000471	hsa-miR-200a	0.000598	hsa-miR-513	0	366

## Sheet: SU_Discretizados
	Relevance as Symmetrical Uncertainty
	Relap vs. Rem		Rem vs. CON		Relap vs. CON
	gene	SU	gene	SU	gene	SU
1	hsa-miR-542-5p	0.527684	hsa-miR-96	0.48324	hsa-miR-599	0.86507
2	hsa-miR-376a	0.492094	hsa-miR-30a-5p	0.298911	hsa-miR-18b	0.64161
3	hsa-miR-18b	0.404807	hsa-miR-30e-5p	0.295942	hsa-miR-423	0.63671
4	hsa-miR-34c	0.403858	hsa-miR-599	0.295942	hsa-miR-125b	0.57381
5	hsa-miR-489	0.403858	hsa-miR-193a	0.295942	hsa-miR-383	0.53917
6	hsa-miR-554	0.403858	hsa-miR-337	0.295942	hsa-miR-509	0.53917
7	hsa-miR-600	0.403858	hsa-miR-449b	0.259079	hsa-miR-30e-5p	0.53917
8	hsa-miR-652	0.403858	hsa-miR-184	0.247739	hsa-miR-487b	0.51674
9	hsa-miR-214	0.386253	hsa-miR-328	0.228342	hsa-miR-222	0.49696
10	hsa-miR-328	0.372928	hsa-miR-146b	0.223821	hsa-miR-127	0.49651
11	hsa-miR-520h	0.365063	hsa-miR-383	0.223821	hsa-miR-214	0.47696
12	hsa-miR-126	0.365063	hsa-miR-542-5p	0.223821	hsa-miR-148a	0.43964
13	hsa-miR-520e	0.365063	4343438-Blank	0.223821	hsa-miR-652	0.3932
14	hsa-miR-372	0.365063	hsa-miR-550	0.221439	hsa-miR-184	0.3932
15	hsa-miR-200a	0.365063	hsa-miR-646	0.221264	hsa-miR-146b	0.3932
16	hsa-miR-34b	0.365063	hsa-miR-362	0.221264	hsa-miR-204	0.3842
17	hsa-miR-137	0.365063	hsa-miR-133b	0.221264	hsa-miR-29c	0.35794
18	hsa-miR-380-5p	0.365063	hsa-miR-330	0.218389	hsa-miR-19a	0.35374
19	hsa-miR-411	0.360276	hsa-miR-200c	0.218389	hsa-miR-520e	0.35374
20	hsa-miR-193a	0.352339	hsa-miR-149	0.216055	hsa-miR-20b	0.35374
21	hsa-miR-206	0.352339	hsa-miR-500	0.20689	hsa-miR-642	0.35374
22	hsa-miR-99b	0.347886	hsa-miR-506	0.20689	hsa-miR-301	0.35374
23	hsa-miR-422a	0.312492	hsa-miR-512-3p	0.20689	hsa-miR-374	0.35374
24	hsa-miR-409-5p	0.310895	hsa-miR-34a	0.20689	hsa-miR-576	0.35294
25	hsa-miR	0.30977	hsa-miR-659	0.20689	hsa-miR-181c	0.35294
26	hsa-miR-487b	0.301562	hsa-miR-629	0.200686	hsa-miR	0.35294
27	hsa-miR-599	0.301562	hsa-miR-423	0.196546	hsa-miR-213	0.35294
28	hsa-miR-423	0.298411	hsa-miR-125a	0.196546	hsa-miR-32	0.35158
29	hsa-let-7f	0.298411	hsa-miR-194	0.196546	hsa-miR-580	0.35158
30	hsa-miR-659	0.298411	hsa-miR-200a	0.192994	hsa-miR-125a	0.34842
31	hsa-miR-204	0.289023	hsa-miR-34c	0.192994	hsa-miR-369-3p	0.34842
32	hsa-miR-125b	0.289023	hsa-miR-489	0.192994	hsa-miR-554	0.34842
33	hsa-miR-135a	0.287429	hsa-miR-1	0.185961	hsa-miR-99b	0.34842
34	hsa-miR-218	0.287429	hsa-miR-15a	0.184553	hsa-miR-10b	0.34842
35	hsa-miR-382	0.275336	hsa-miR-410	0.184553	hsa-miR-411	0.34842
36	hsa-miR-7	0.271601	hsa-miR-127	0.180238	hsa-miR-99a	0.34353
37	hsa-miR-362	0.271601	hsa-miR-509	0.171212	hsa-miR-194	0.34353
38	hsa-miR-155	0.271601	hsa-miR-562	0.171212	hsa-miR-146a	0.34353
39	hsa-miR-646	0.271601	hsa-miR-642	0.171212	hsa-let-7f	0.33701
40	hsa-miR-135b	0.271601	hsa-miR-627	0.167474	hsa-miR-597	0.31784
41	hsa-miR-31	0.271601	hsa-miR-449	0.165406	hsa-miR-147	0.29154
42	hsa-miR-494	0.267683	hsa-miR-594	0.161872	hsa-miR-325	0.29154
43	hsa-miR-213	0.267683	hsa-miR-148a	0.16184	hsa-miR-29a	0.29154
44	hsa-miR	0.267683	hsa-miR-223	0.16184	hsa-miR-208	0.29154
45	hsa-miR-93	0.267683	hsa-miR-93	0.159144	hsa-miR	0.29154
46	hsa-miR-589	0.234361	hsa-miR-519e	0.157757	hsa-miR-659	0.29154
47	hsa-miR-148a	0.234361	hsa-miR-492	0.157757	hsa-miR-187	0.29154
48	hsa-miR-200c	0.22982	hsa-miR-520a	0.157757	hsa-miR-220	0.29154
49	hsa-miR-29c	0.22982	hsa-miR-520g	0.157757	hsa-miR-380-3p	0.29154
50	hsa-miR-223	0.218121	hsa-miR-302c	0.157757	hsa-miR-491	0.29154
51	hsa-miR-509	0.218121	hsa-miR-33	0.157757	hsa-miR-337	0.29154
52	hsa-miR-520d	0.215283	hsa-miR-493	0.157757	hsa-miR-205	0.29154
53	hsa-miR-555	0.215283	hsa-miR-503	0.157757	hsa-miR-363	0.28614
54	hsa-miR-302c	0.215283	hsa-miR-206	0.157757	hsa-miR-190	0.28614
55	hsa-miR-563	0.215283	hsa-miR-617	0.157757	hsa-miR-155	0.28614
56	hsa-miR-520c	0.215283	hsa-miR-196a	0.157757	hsa-miR-7	0.28614
57	hsa-miR-626	0.215283	hsa-miR-198	0.157757	hsa-let-7e	0.28266
58	hsa-miR-520b	0.215283	hsa-miR-518b	0.1536	hsa-miR-23a	0.28245
59	hsa-miR-548b	0.215283	hsa-miR-429	0.1536	hsa-miR-518b	0.28245
60	hsa-miR-549	0.215283	hsa-miR-133a	0.148148	hsa-miR-422a	0.26428
61	hsa-miR-510	0.215283	hsa-miR-597	0.147539	hsa-let-7d	0.26428
62	hsa-miR-544	0.215283	hsa-miR-148b	0.136965	hsa-miR-31	0.26428
63	hsa-miR-521	0.215283	hsa-miR-190	0.136965	hsa-miR-331	0.26428
64	hsa-miR-553	0.215283	hsa-miR-296	0.135618	hsa-miR-203	0.26428
65	hsa-miR-515-5p	0.215283	hsa-miR-30d	0.135618	hsa-miR-218	0.26334
66	hsa-miR-520f	0.215283	hsa-miR-143	0.134632	hsa-miR-376a	0.26334
67	hsa-miR-217	0.215283	hsa-miR-331	0.134632	hsa-miR-486	0.26334
68	hsa-miR-216	0.215283	hsa-miR-99a	0.128092	hsa-miR-656	0.24642
69	hsa-miR-371	0.215283	hsa-miR-10b	0.128092	hsa-miR-589	0.24642
70	hsa-miR-23b	0.215283	hsa-miR-100	0.128092	hsa-miR-512-5p	0.21455
71	hsa-miR-593	0.215283	hsa-miR-382	0.123532	hsa-miR-198	0.21455
72	hsa-miR-596	0.215283	hsa-miR-496	0.123532	hsa-miR-202	0.21455
73	hsa-miR-517b	0.215283	hsa-miR-199b	0.123532	hsa-miR-506	0.21455
74	hsa-miR-518d	0.215283	hsa-miR-197	0.117565	hsa-miR-512-3p	0.21455
75	hsa-miR-518c	0.215283	hsa-miR-515-3p	0.116743	hsa-miR-122a	0.21455
76	hsa-miR-367	0.215283	hsa-miR-502	0.116743	hsa-miR-510	0.21455
77	hsa-miR-339	0.215283	hsa-miR-511	0.116743	hsa-miR-518d	0.21455
78	hsa-miR-518a	0.215283	hsa-miR-501	0.116683	hsa-miR-518a	0.21455
79	hsa-miR-658	0.215283	hsa-miR-551a	0.116683	hsa-miR-609	0.21455
80	hsa-miR-517a	0.215283	hsa-let-7c	0.116039	hsa-miR-182	0.21455
81	hsa-miR-302d	0.215283	hsa-miR-656	0.116039	hsa-miR-613	0.21455
82	hsa-miR-569	0.215283	hsa-miR-580	0.116039	hsa-miR-515-5p	0.21455
83	hsa-miR-657	0.215283	hsa-miR-342	0.116039	hsa-miR-124a	0.21455
84	hsa-miR-302a	0.215283	hsa-miR-380-5p	0.114425	hsa-miR-517c	0.21455
85	hsa-miR-587	0.215283	hsa-miR-510	0.114425	hsa-miR-517a	0.21455
86	hsa-miR-586	0.215283	hsa-miR-517a	0.114425	hsa-miR-517b	0.21455
87	hsa-miR-142-5p	0.215283	hsa-miR-518d	0.114425	hsa-miR-302a	0.21455
88	hsa-miR-588	0.215283	hsa-miR-520d	0.114425	hsa-miR-302b	0.21455
89	hsa-miR-376b	0.215283	hsa-miR-339	0.114425	hsa-miR-662	0.21455
90	hsa-miR-512-5p	0.211975	hsa-miR-520b	0.114425	hsa-miR-302a	0.21455
91	hsa-miR-514	0.211975	hsa-miR-520c	0.114425	hsa-miR-302d	0.21455
92	hsa-miR-205	0.211975	hsa-miR-34b	0.114425	hsa-miR-367	0.21455
93	hsa-miR-202	0.211975	hsa-miR-515-5p	0.114425	hsa-miR-302b	0.21455
94	hsa-miR-517c	0.211975	hsa-miR-372	0.114425	hsa-miR-371	0.21455
95	hsa-miR-662	0.211975	hsa-miR-518a	0.114425	hsa-miR-302c	0.21455
96	hsa-miR-30e-3p	0.211975	hsa-miR-518c	0.114425	hsa-miR-105	0.21455
97	hsa-miR-302c	0.211975	hsa-miR-517b	0.114425	hsa-miR-647	0.21455
98	hsa-miR-380-3p	0.211975	hsa-miR-367	0.114425	hsa-miR-500	0.21455
99	hsa-miR-661	0.211975	hsa-miR-371	0.114425	hsa-miR-644	0.21455
100	hsa-miR-325	0.211975	hsa-miR-302a	0.114425	hsa-miR-631	0.21455
101	hsa-miR-299-3p	0.211975	hsa-miR-554	0.114425	hsa-miR-299-3p	0.21455
102	hsa-miR-361	0.211975	hsa-miR-626	0.114425	hsa-miR-661	0.21455
103	hsa-miR-27a	0.211975	hsa-miR-216	0.114425	hsa-miR-216	0.21455
104	hsa-miR-147	0.211975	hsa-miR-302d	0.114425	hsa-miR-653	0.21455
105	hsa-miR-491	0.211975	hsa-miR-302c	0.114425	hsa-miR-217	0.21455
106	hsa-miR-653	0.211975	hsa-miR-520h	0.114425	hsa-miR-129	0.21455
107	hsa-miR-128b	0.211975	hsa-miR-520f	0.114425	hsa-miR-329	0.21455
108	hsa-miR-129	0.211975	hsa-miR-600	0.114425	hsa-miR-607	0.21455
109	hsa-miR-208	0.211975	hsa-miR-217	0.114425	hsa-miR-585	0.21455
110	hsa-miR-302b	0.211975	hsa-miR-126	0.114425	hsa-miR-578	0.21455
111	hsa-miR-220	0.211975	hsa-miR-521	0.114425	hsa-miR-521	0.21455
112	hsa-miR-485-3p	0.211975	hsa-miR-137	0.114425	hsa-miR-558	0.21455
113	hsa-miR-302b	0.211975	hsa-miR-575	0.113675	hsa-miR-339	0.21455
114	hsa-miR-302a	0.211975	hsa-miR-451	0.113675	hsa-miR-548c	0.21455
115	hsa-miR-182	0.211975	hsa-miR-624	0.112946	hsa-miR-606	0.21455
116	hsa-miR-614	0.211975	hsa-miR-222	0.112946	hsa-miR-128b	0.21455
117	hsa-miR-631	0.211975	hsa-let-7f	0.112946	hsa-miR-603	0.21455
118	hsa-miR-613	0.211975	hsa-miR-484	0.109675	hsa-miR-520c	0.21455
119	hsa-miR-558	0.211975	hsa-miR-199a	0.10613	hsa-miR-520b	0.21455
120	hsa-miR-124a	0.211975	hsa-miR-196b	0.095352	hsa-miR-520d	0.21455
121	hsa-miR-647	0.211975	hsa-miR-409-5p	0.094868	hsa-miR-520a	0.21455
122	hsa-miR-615	0.211975	hsa-miR-380-3p	0.094868	hsa-miR-520f	0.21455
123	hsa-miR-122a	0.211975	hsa-miR-220	0.094868	hsa-miR-520g	0.21455
124	hsa-miR-548c	0.211975	hsa-miR-205	0.094868	hsa-miR-608	0.21455
125	hsa-miR-606	0.211975	hsa-miR-208	0.094868	hsa-miR-555	0.20862
126	hsa-miR-607	0.211975	hsa-miR-147	0.094868	hsa-miR-23b	0.20862
127	hsa-miR-585	0.211975	hsa-miR-491	0.094868	hsa-miR-588	0.20862
128	hsa-miR-578	0.211975	hsa-miR-325	0.094868	hsa-miR-562	0.20862
129	hsa-miR-603	0.211975	hsa-miR-361	0.094002	hsa-miR-552	0.20862
130	hsa-miR-105	0.211975	hsa-miR-518f	0.094002	hsa-miR-96	0.20862
131	hsa-miR-633	0.211975	hsa-miR-519b	0.094002	hsa-miR-485-3p	0.20862
132	hsa-miR-609	0.211975	hsa-miR-448	0.094002	hsa-miR-361	0.20862
133	hsa-miR-566	0.211975	hsa-miR-485-3p	0.094002	hsa-miR-553	0.20862
134	hsa-miR-608	0.211975	hsa-miR-30e-3p	0.094002	hsa-miR-596	0.20862
135	hsa-miR-23a	0.21168	hsa-miR-526b	0.094002	hsa-miR-376b	0.20862
136	hsa-miR-485-5p	0.21168	hsa-miR-518c	0.094002	hsa-miR-570	0.20862
137	hsa-miR-222	0.19678	hsa-miR-453	0.094002	hsa-miR-30e-3p	0.20862
138	hsa-let-7d	0.19678	hsa-miR-374	0.094002	hsa-miR-593	0.20862
139	hsa-let-7a	0.19678	hsa-miR-373	0.094002	hsa-miR-587	0.20862
140	hsa-miR-486	0.189864	hsa-miR-522	0.094002	hsa-miR-586	0.20862
141	hsa-miR-15a	0.189864	hsa-miR-524	0.094002	hsa-miR-657	0.20862
142	hsa-miR-330	0.189864	hsa-miR-523	0.094002	hsa-miR-27a	0.20862
143	hsa-miR-20b	0.182197	hsa-miR-368	0.094002	hsa-miR-563	0.20862
144	hsa-miR-196a	0.182197	hsa-miR-519c	0.094002	hsa-miR-569	0.20862
145	hsa-miR-19a	0.182197	hsa-miR-373	0.094002	hsa-miR-658	0.20862
146	hsa-miR-594	0.182197	hsa-miR-633	0.094002	hsa-miR-566	0.20862
147	hsa-miR-301	0.182197	hsa-miR-519d	0.094002	hsa-miR-548b	0.20862
148	hsa-miR-374	0.182197	hsa-miR-514	0.094002	hsa-miR-514	0.20862
149	hsa-miR-490	0.178638	hsa-miR-513	0.094002	hsa-miR-493	0.20862
150	hsa-miR-296	0.177319	hsa-miR-516-5p	0.094002	hsa-miR-142-5p	0.20862
151	hsa-miR-106b	0.168253	hsa-miR-27a	0.094002	hsa-miR-544	0.20862
152	hsa-let-7b	0.168253	hsa-miR-20b	0.094002	hsa-miR-617	0.20862
153	hsa-miR-96	0.168253	hsa-miR-507	0.094002	hsa-miR-503	0.20862
154	hsa-miR-126	0.168253	hsa-miR-566	0.094002	hsa-miR-33	0.20862
155	hsa-miR-29a	0.168253	hsa-miR-219	0.094002	4343438-Blank	0.20862
156	hsa-miR-197	0.168253	hsa-miR-504	0.094002	hsa-miR-633	0.20862
157	hsa-miR-30c	0.168253	hsa-miR-570	0.094002	hsa-miR-492	0.20862
158	hsa-miR-618	0.168253	hsa-miR-505	0.094002	hsa-miR-549	0.20862
159	hsa-miR-215	0.160883	hsa-miR-552	0.094002	hsa-miR-519e	0.20862
160	hsa-miR-32	0.160883	hsa-miR-19a	0.094002	hsa-miR-320	0.20431
161	hsa-miR-146b	0.160883	hsa-miR-488	0.094002	hsa-miR-103	0.20431
162	hsa-miR-149	0.156078	hsa-miR-301	0.094002	hsa-miR-342	0.2006
163	hsa-miR-299-5p	0.156078	hsa-miR-517	0.094002	hsa-miR-95	0.2006
164	hsa-miR-24	0.156078	hsa-miR-203	0.090079	hsa-let-7b	0.2006
165	hsa-miR-576	0.153655	hsa-miR-224	0.08785	hsa-miR-410	0.2006
166	hsa-miR-181c	0.153655	hsa-miR-601	0.08785	hsa-miR-17-3p	0.2006
167	hsa-miR-363	0.153655	hsa-miR-422a	0.084716	hsa-miR-449b	0.2006
168	hsa-miR-187	0.153655	hsa-miR-654	0.084716	hsa-miR-494	0.18344
169	hsa-miR-132	0.145902	hsa-miR-152	0.084321	hsa-miR-532	0.18344
170	hsa-miR-320	0.145902	hsa-miR-615	0.083646	hsa-miR-485-5p	0.18344
171	hsa-miR-103	0.145902	hsa-miR-381	0.083646	hsa-miR-345	0.18344
172	hsa-miR-183	0.145902	hsa-miR-614	0.083646	hsa-miR-324-5p	0.17344
173	hsa-miR-572	0.145902	hsa-miR-23a	0.08258	hsa-miR-132	0.17344
174	hsa-miR-125a	0.145902	hsa-miR-345	0.08258	hsa-miR-183	0.17344
175	hsa-miR-95	0.141171	hsa-miR-376a	0.082133	hsa-miR-135a	0.17344
176	hsa-miR-17-3p	0.141171	hsa-miR-338	0.082133	hsa-miR-629	0.17152
177	hsa-miR-1	0.141171	hsa-miR-199a	0.082133	hsa-miR-135b	0.17152
178	hsa-miR-326	0.141171	hsa-miR-195	0.082133	hsa-miR-224	0.17152
179	hsa-miR-654	0.141171	hsa-miR-146a	0.082133	hsa-miR-375	0.17029
180	hsa-miR-451	0.141171	hsa-miR-363	0.082133	hsa-miR-9	0.17029
181	hsa-miR-34a	0.140359	hsa-miR-125b	0.082133	hsa-miR-335	0.17029
182	hsa-miR-340	0.140359	hsa-miR-644	0.082133	hsa-miR-126	0.17029
183	hsa-miR-323	0.140359	hsa-miR-424	0.082133	hsa-miR-372	0.17029
184	hsa-miR-642	0.140359	hsa-miR-452	0.082133	hsa-miR-520h	0.17029
185	hsa-miR-369-3p	0.140359	hsa-miR-490	0.082133	hsa-miR-137	0.17029
186	hsa-miR-30b	0.140359	hsa-miR-639	0.082133	hsa-miR-422b	0.17029
187	hsa-miR-335	0.140359	hsa-miR-101	0.079783	hsa-miR-19b	0.17029
188	hsa-miR-565	0.140359	hsa-miR-618	0.077332	hsa-miR-550	0.17029
189	hsa-miR-134	0.140359	hsa-miR-494	0.077332	hsa-miR-100	0.17029
190	hsa-miR-660	0.140359	hsa-miR-649	0.077332	hsa-miR-451	0.17029
191	hsa-miR-101	0.140359	hsa-miR-200b	0.077332	hsa-miR-380-5p	0.17029
192	hsa-miR-199b	0.140359	hsa-miR-324-3p	0.07695	hsa-miR-34a	0.17029
193	hsa-miR-19b	0.140359	hsa-miR-497	0.076841	hsa-miR-196a	0.17029
194	hsa-miR-10a	0.140359	hsa-miR-376a	0.076841	hsa-miR-34b	0.17029
195	hsa-miR-497	0.140359	hsa-miR-10a	0.076841	hsa-miR-660	0.17029
196	hsa-miR-186	0.140359	hsa-miR-192	0.071543	hsa-miR-452	0.1654
197	hsa-miR-591	0.140359	hsa-miR-142-3p	0.070471	hsa-miR-133a	0.16323
198	hsa-miR-511	0.133638	hsa-miR-9	0.070471	hsa-miR-145	0.16323
199	hsa-miR-412	0.133638	hsa-miR-365	0.070471	hsa-miR-149	0.15442
200	hsa-miR-211	0.133638	hsa-miR-15b	0.069843	hsa-miR-542-5p	0.15442
201	hsa-miR-189	0.133638	hsa-let-7a	0.069843	hsa-miR-627	0.15442
202	hsa-miR-518e	0.133638	hsa-miR-576	0.067656	hsa-miR-142-3p	0.15358
203	hsa-miR-649	0.131319	hsa-miR-181c	0.067656	hsa-miR-130a	0.15358
204	hsa-miR-30a-5p	0.131319	hsa-miR-323	0.066715	hsa-miR-551b	0.15358
205	hsa-miR-21	0.131319	hsa-miR-452	0.066715	hsa-miR-126	0.15358
206	hsa-miR-133b	0.131319	hsa-miR-369-3p	0.066715	hsa-miR-624	0.15358
207	hsa-miR-9	0.131319	hsa-miR-329	0.066715	hsa-miR-101	0.15358
208	hsa-miR-30a-3p	0.131319	hsa-miR-18b	0.066715	hsa-miR-106b	0.15358
209	hsa-miR-200b	0.131319	hsa-miR-375	0.066715	hsa-miR-186	0.13352
210	hsa-miR-9	0.131319	hsa-let-7e	0.066304	hsa-miR-134	0.13352
211	hsa-miR-564	0.131319	hsa-miR-32	0.058874	hsa-let-7c	0.13352
212	hsa-miR-18a	0.131319	hsa-miR-9	0.056174	hsa-miR-200c	0.13352
213	hsa-miR-422b	0.131319	hsa-miR-422b	0.056174	hsa-miR-223	0.13352
214	hsa-miR-452	0.125846	hsa-miR-29a	0.056174	hsa-miR-340	0.13352
215	hsa-let-7e	0.125846	hsa-miR-411	0.056174	hsa-miR-639	0.13352
216	hsa-miR-127	0.124394	hsa-miR-551b	0.055918	hsa-miR-564	0.13352
217	hsa-miR-650	0.124394	hsa-miR-450	0.055918	hsa-miR-34c	0.13352
218	hsa-miR-601	0.110935	hsa-miR-487b	0.055918	hsa-miR-489	0.13352
219	hsa-miR-383	0.110935	hsa-miR-130a	0.055918	hsa-miR-376a	0.13352
220	hsa-miR-28	0.110935	hsa-miR-187	0.055918	hsa-miR-591	0.13352
221	hsa-miR-146a	0.110935	hsa-miR-210	0.051732	hsa-miR-330	0.13352
222	hsa-miR-449	0.110935	hsa-miR-145	0.051732	hsa-miR-630	0.13342
223	hsa-miR-532	0.106308	hsa-miR-98	0.051732	hsa-miR-192	0.13342
224	hsa-miR-597	0.106308	hsa-miR-29c	0.044943	hsa-miR-449	0.13342
225	hsa-miR-224	0.106308	hsa-miR-191	0.044943	hsa-miR-326	0.13207
226	hsa-miR-644	0.106308	hsa-miR-202	0.044943	hsa-miR-21	0.13207
227	hsa-miR-26a	0.10584	hsa-miR-24	0.044334	hsa-miR-496	0.13207
228	hsa-miR-153	0.10584	hsa-miR-425	0.044334	hsa-miR-18a	0.13207
229	hsa-miR-580	0.10584	hsa-miR-572	0.044334	hsa-miR-30b	0.13207
230	hsa-miR-324-5p	0.10584	hsa-miR-25	0.042749	hsa-miR-30c	0.13207
231	hsa-miR-107	0.104749	hsa-miR-140	0.042749	hsa-miR-30a-3p	0.13207
232	hsa-miR-656	0.0990178	hsa-miR-378	0.042749	hsa-miR-565	0.13207
233	hsa-miR-501	0.0990178	hsa-let-7d	0.042749	hsa-miR-299-5p	0.1258
234	hsa-miR-551a	0.0990178	hsa-miR-92	0.042749	hsa-miR-650	0.1258
235	hsa-miR-30e-5p	0.0950248	hsa-miR-17-3p	0.035399	hsa-miR-548d	0.1214
236	hsa-miR-410	0.0950248	hsa-miR-214	0.035399	hsa-let-7a	0.1214
237	hsa-miR-98	0.0950248	hsa-miR-95	0.035399	hsa-miR-206	0.11747
238	hsa-miR-148b	0.0909127	hsa-miR-189	0.034022	hsa-miR-412	0.11747
239	hsa-miR-200a	0.0909127	hsa-miR-651	0.034022	hsa-miR-323	0.11747
240	hsa-miR-99a	0.0784747	hsa-miR-211	0.034022	hsa-miR-518e	0.11747
241	hsa-miR	0.0784747	hsa-miR-548a	0.034022	hsa-miR-600	0.11747
242	hsa-miR-142-3p	0.0784747	hsa-miR-139	0.030562	hsa-miR-575	0.11747
243	hsa-miR-429	0.0784747	hsa-miR-324-5p	0.030562	hsa-miR-215	0.11529
244	hsa-miR-579	0.0784747	hsa-miR-135a	0.030517	hsa-miR-20a	0.09386
245	hsa-miR-324-3p	0.0784747	hsa-miR-215	0.030517	hsa-miR-378	0.09386
246	hsa-miR-622	0.0784747	hsa-miR-135b	0.030517	hsa-miR-182	0.09386
247	hsa-miR-516-5p	0.0772315	hsa-miR-151	0.030517	hsa-miR-143	0.09386
248	hsa-miR-513	0.0772315	hsa-miR-486	0.029978	hsa-miR-196b	0.09386
249	hsa-miR-504	0.0772315	hsa-miR-630	0.029418	hsa-miR-185	0.09277
250	hsa-miR-488	0.0772315	hsa-miR-218	0.029418	hsa-miR-107	0.09277
251	hsa-miR-507	0.0772315	hsa-miR-548d	0.029418	hsa-miR-24	0.09277
252	hsa-miR-505	0.0772315	hsa-miR-28	0.029418	hsa-miR-490	0.09093
253	hsa-miR-522	0.0772315	hsa-miR	0.028077	hsa-miR-545	0.08355
254	hsa-miR-519d	0.0772315	hsa-miR-213	0.028077	hsa-miR-152	0.08355
255	hsa-miR-526b	0.0772315	hsa-miR-193b	0.028077	hsa-miR-199a	0.0743
256	hsa-miR-523	0.0772315	hsa-miR-30c	0.028077	hsa-miR-409-5p	0.0743
257	hsa-miR-524	0.0772315	hsa-miR-30b	0.026987	hsa-miR-382	0.0743
258	hsa-miR-518c	0.0772315	hsa-miR-565	0.026987	hsa-miR-26a	0.07155
259	hsa-miR-517	0.0772315	hsa-miR	0.025686	hsa-miR-511	0.07155
260	hsa-miR-519c	0.0772315	hsa-miR-532	0.025686	hsa-miR-379	0.06829
261	hsa-miR-518f	0.0772315	hsa-miR-153	0.023742	hsa-miR-381	0.06829
262	hsa-miR-519b	0.0772315	hsa-miR-545	0.023742	hsa-miR-296	0.06829
263	hsa-miR-373	0.0772315	hsa-miR-425-5p	0.023742	hsa-miR-614	0.06829
264	hsa-miR-373	0.0772315	hsa-miR-369-5p	0.023742	hsa-miR-615	0.06829
265	hsa-miR-448	0.0772315	hsa-let-7g	0.023742	hsa-miR-616	0.06829
266	hsa-miR-219	0.0772315	hsa-miR-181b	0.023742	hsa-miR-515-3p	0.06244
267	hsa-miR-453	0.0772315	hsa-miR-660	0.015282	hsa-miR-328	0.06244
268	hsa-miR-368	0.0772315	hsa-miR-508	0.015282	hsa-miR-502	0.06244
269	hsa-miR-365	0.0741034	hsa-miR-335	0.015282	hsa-miR-93	0.06244
270	hsa-miR-10b	0.0741034	hsa-miR-19b	0.015282	hsa-miR-579	0.05905
271	hsa-miR-203	0.0665343	hsa-miR-99b	0.015282	hsa-miR-141	0.05905
272	hsa-miR-331	0.0665343	hsa-miR-616	0.011732	hsa-miR-654	0.05905
273	hsa-miR-450	0.0665343	hsa-miR-379	0.011732	hsa-miR-30a-5p	0.05905
274	hsa-miR-345	0.0665343	hsa-miR-204	0.011732	hsa-miR-140	0.05905
275	hsa-miR-185	0.0665343	hsa-miR-16	0.010706	hsa-miR-425-5p	0.05905
276	hsa-miR-338	0.064219	hsa-miR-182	0.010706	hsa-miR-30d	0.05905
277	hsa-miR-519e	0.064219	hsa-miR-26a	0.010706	hsa-miR-98	0.05905
278	hsa-miR-33	0.064219	hsa-miR-20a	0.010706	hsa-miR-92	0.05905
279	hsa-miR-329	0.064219	hsa-miR-26b	0.010428	hsa-miR-28	0.05905
280	hsa-miR-452	0.064219	hsa-miR-103	0.010428	hsa-miR-622	0.05905
281	hsa-miR-503	0.064219	hsa-miR-17-5p	0.010428	hsa-miR-27b	0.0549
282	hsa-miR-424	0.064219	hsa-miR-320	0.010428	hsa-miR-572	0.0549
283	hsa-miR-617	0.064219	hsa-miR-200a	0.010428	hsa-miR-153	0.0549
284	hsa-miR-492	0.064219	hsa-miR-155	0.006762	hsa-miR-484	0.0549
285	hsa-miR-493	0.064219	hsa-miR-7	0.006762	hsa-miR-200a	0.0549
286	hsa-miR-195	0.0497694	hsa-miR-564	0.006762	hsa-miR-189	0.03465
287	hsa-miR-616	0.0497694	hsa-let-7b	0.006762	hsa-miR-211	0.03465
288	hsa-miR-627	0.0497694	hsa-miR-141	0.005404	hsa-miR-15a	0.03465
289	4343438-Blank	0.0497694	hsa-miR-299-5p	0.005054	hsa-miR-148b	0.03465
290	hsa-miR-199a	0.0497694	hsa-miR-183	0.005054	hsa-miR-202	0.02906
291	hsa-miR-518b	0.0497694	hsa-miR-130b	0.005054	hsa-miR-200a	0.02906
292	hsa-miR-379	0.0497694	hsa-miR-650	0.005054	hsa-miR-191	0.02906
293	hsa-miR-548d	0.0497694	hsa-miR-221	0.005054	hsa-miR-181d	0.02904
294	hsa-miR-199a	0.0497694	hsa-miR-132	0.005054	hsa-miR-130b	0.02904
295	hsa-miR-145	0.0486649	hsa-miR-22	0.005054	hsa-miR-139	0.02904
296	hsa-miR-27b	0.0486649	hsa-miR-181d	0.005054	hsa-miR-221	0.02904
297	hsa-miR-133a	0.0480351	hsa-miR-326	0.003697	hsa-miR-551a	0.02505
298	hsa-miR-376a	0.0480351	hsa-miR-485-5p	0.003038	hsa-miR-501	0.02505
299	hsa-miR-484	0.0480351	hsa-miR-185	0.003038	hsa-miR-450	0.02505
300	hsa-miR-545	0.044147	hsa-miR-27b	0.003038	hsa-miR-17-5p	0.02253
301	hsa-miR-630	0.044147	hsa-miR-107	0.003038	hsa-miR-646	0.02253
302	hsa-miR-182	0.044147	hsa-miR-126	0.002181	hsa-miR-425	0.02253
303	hsa-miR-20a	0.044147	hsa-miR-31	0.002181	hsa-miR-26b	0.02253
304	hsa-miR-342	0.044147	hsa-miR-106b	0.002181	hsa-miR-362	0.02253
305	hsa-miR-449b	0.044147	hsa-miR-18a	0.002181	hsa-miR-649	0.02253
306	hsa-miR-496	0.0406562	hsa-miR-21	0.002181	hsa-let-7g	0.02253
307	hsa-miR-639	0.0406562	hsa-miR-30a-3p	0.002181	hsa-miR-200b	0.02253
308	hsa-miR-375	0.0406562	hsa-miR-579	0.001838	hsa-miR-618	0.02253
309	hsa-miR-130a	0.038526	hsa-miR-556	0.001838	hsa-miR-429	0.02253
310	hsa-miR-141	0.038526	hsa-miR-622	0.001838	hsa-miR	0.02253
311	hsa-miR-143	0.038526	hsa-miR-186	0.001276	hsa-miR-133b	0.02253
312	hsa-miR-551b	0.038526	hsa-miR-134	0.001276	hsa-miR-645	0.01535
313	hsa-miR-192	0.0352424	hsa-miR-589	0.001276	hsa-miR-626	0.01535
314	hsa-miR-130b	0.0352424	hsa-miR-591	0.001114	hsa-miR-508	0.01535
315	hsa-miR-190	0.0352424	hsa-miR-340	0.001114	hsa-miR-199a	0.01535
316	hsa-miR-92	0.0352424	hsa-miR-124a	0.000633	hsa-miR-302c	0.01535
317	hsa-miR-425	0.0352424	hsa-miR-122a	0.000633	hsa-miR-195	0.01535
318	hsa-miR-15b	0.0352424	hsa-miR-299-3p	0.000633	hsa-miR-518c	0.01535
319	hsa-miR-140	0.0352424	hsa-miR-578	0.000633	hsa-miR-452	0.01535
320	hsa-miR-194	0.0352424	hsa-miR-653	0.000633	hsa-miR-210	0.01051
321	hsa-miR-381	0.0219599	hsa-miR-661	0.000633	hsa-miR-10a	0.01051
322	hsa-miR-570	0.0219599	hsa-miR-302b	0.000633	hsa-miR-556	0.01051
323	hsa-miR-552	0.0219599	hsa-miR-302a	0.000633	hsa-miR-594	0.01051
324	hsa-miR-651	0.0219599	hsa-miR-662	0.000633	hsa-miR-25	0.01051
325	hsa-miR-645	0.0219599	hsa-miR-558	0.000633	hsa-miR-197	0.01051
326	hsa-miR-515-3p	0.0219599	hsa-miR-548c	0.000633	hsa-miR-497	0.01051
327	hsa-miR-502	0.0219599	hsa-miR-302b	0.000633	hsa-miR-324-3p	0.01051
328	hsa-miR-548a	0.0219599	hsa-miR-129	0.000633	hsa-miR-9	0.01051
329	hsa-miR-520a	0.0219599	hsa-miR-128b	0.000633	hsa-miR-1	0.01051
330	hsa-miR-520g	0.0219599	hsa-miR-609	0.000633	hsa-miR-16	0.01051
331	hsa-miR-337	0.0219599	hsa-miR-613	0.000633	hsa-miR-15b	0.01051
332	hsa-miR-198	0.0219599	hsa-miR-607	0.000633	hsa-miR-199b	0.00354
333	hsa-miR-181b	0.0185537	hsa-miR-608	0.000633	hsa-miR-365	0.00354
334	hsa-miR-202	0.0185537	hsa-miR-512-5p	0.000633	hsa-miR-193b	0.00354
335	hsa-miR-369-5p	0.0185537	hsa-miR-182	0.000633	hsa-miR-193a	0.00354
336	hsa-miR-191	0.0185537	hsa-miR-631	0.000633	hsa-miR-601	0.00276
337	hsa-miR-210	0.0185537	hsa-miR-517c	0.000633	hsa-miR-151	0.00276
338	hsa-miR-151	0.0161271	hsa-miR-518e	0.000633	hsa-miR-22	0.00276
339	hsa-miR-100	0.0161271	hsa-miR-412	0.000633	hsa-miR-369-5p	0.00276
340	hsa-miR-30d	0.0161271	hsa-miR-105	0.000633	hsa-miR-181b	0.00276
341	hsa-miR-556	0.0161271	hsa-miR-585	0.000633	hsa-miR-651	0.00121
342	hsa-miR-17-5p	0.011107	hsa-miR-202	0.000633	hsa-miR-548a	0.00121
343	hsa-miR-624	0.011107	hsa-miR-647	0.000633	hsa-miR-338	0.00121
344	hsa-miR-550	0.011107	hsa-miR-645	0.000633	hsa-miR-424	0.00121
345	hsa-miR-181d	0.011107	hsa-miR	0.000633	hsa-miR-219	0
346	hsa-miR-378	0.011107	hsa-miR-606	0.000633	hsa-miR-368	0
347	hsa-miR-25	0.011107	hsa-miR-603	0.000633	hsa-miR-373	0
348	hsa-miR-425-5p	0.011107	hsa-miR-555	0	hsa-miR-448	0
349	hsa-miR-26b	0.011107	hsa-miR-553	0	hsa-miR-373	0
350	hsa-miR-221	0.011107	hsa-miR-563	0	hsa-miR-526b	0
351	hsa-miR-22	0.011107	hsa-miR-23b	0	hsa-miR-524	0
352	hsa-miR-193b	0.0107958	hsa-miR-520e	0	hsa-miR-518f	0
353	hsa-miR-184	0.0107958	hsa-miR-376b	0	hsa-miR-519b	0
354	hsa-miR-629	4.94e-16	hsa-miR-549	0	hsa-miR-519c	0
355	hsa-miR-506	4.94e-16	hsa-miR-544	0	hsa-miR-519d	0
356	hsa-miR-508	4.94e-16	hsa-miR-548b	0	hsa-miR-523	0
357	hsa-miR-500	4.94e-16	hsa-miR-652	0	hsa-miR-522	0
358	hsa-miR-512-3p	4.94e-16	hsa-miR-596	0	hsa-miR-504	0
359	hsa-miR-562	4.94e-16	hsa-miR-658	0	hsa-miR-505	0
360	hsa-miR-575	2.23e-16	hsa-miR-142-5p	0	hsa-miR-453	0
361	hsa-miR-152	1.77e-16	hsa-miR-657	0	hsa-miR-488	0
362	hsa-miR-139	1.77e-16	hsa-miR-586	0	hsa-miR-517	0
363	hsa-miR-16	1.77e-16	hsa-miR-569	0	hsa-miR-518c	0
364	hsa-let-7g	1.77e-16	hsa-miR-593	0	hsa-miR-507	0
365	hsa-let-7c	1.77e-16	hsa-miR-587	0	hsa-miR-516-5p	0
366	hsa-miR-196b	1.77e-16	hsa-miR-588	0	hsa-miR-513	0

## Sheet: CFS_Discretizados
	CFS
	3 clases	B vs. NB	NB vs. C	B. vs NB-C	B-NB vs. C	B vs. C
	hsa-miR-423-4373015	hsa-miR-328-4373049	hsa-miR-184-4373113	hsa-miR-18b-4373184	hsa-miR-127-4373147	hsa-miR-125b
	hsa-miR-489-4373214	hsa-miR-34c-4373036	hsa-miR-193a-4373107	hsa-miR-214-4373085	hsa-miR-184-4373113	hsa-miR-18b
	hsa-miR-542-5p-4378105	hsa-miR-376a-4373026	hsa-miR-30a-5p-4373061	hsa-miR-376b-4373196	hsa-miR-30e-5p-4373058	hsa-miR-423
	hsa-miR-554-4380932	hsa-miR-542-5p-4378105	hsa-miR-328-4373049	hsa-miR-411-4381013	hsa-miR-337-4373044	hsa-miR-487b
	hsa-miR-599-4380962	hsa-miR-554-4380932	hsa-miR-337-4373044	hsa-miR-423-4373015	hsa-miR-383-4373018	hsa-miR-599
	hsa-miR-96		hsa-miR-339-4373042	hsa-miR-487b-4378102	hsa-miR-500
			hsa-miR-594-4380958	hsa-miR-554-4380932	hsa-miR-506
			hsa-miR-599-4380962	hsa-miR-599-4380962	hsa-miR-599
			hsa-miR-96-4373010	hsa-miR-652-4380927	hsa-miR-629
				hsa-miR-99b-4373007	hsa-miR-96
