# Supplementary material for: Differential Micro RNA Expression in PBMC from Multiple Sclerosis Patients
Source: PLoS One. 2009 Jul 20;4(7):e6309. doi: 10.1371/journal.pone.0006309 (PMC2708922; doi:10.1371/journal.pone.0006309)
Supplement: Table S5 — Complete list of the miRNA predicted targets (0.05 MB XLS) [file pone.0006309.s005.xls]

## Sheet: all
	target genes
	crossing of three databases: pictar, mirbase and targetscan
		SELECTED MIRNA FROM THE STUDY									RANDOMLY SELECTED MIRNA
MIRNA	18b	599	493	148a	184	193	96	100	15	152	181	202	215	24	30	3	4	381
GENE SYMBOL	PERQ1	UVRAG	ARID4B	USP47	PRKCB1	ZBTB5	MAB21L2	HS3ST2	TMEM55A	MEOX2	C11orf56	SNX5	DBT	AARS	C13orf18	HS3ST2	C11orf56	NASP
	GAB1	LRRC4C	CUL1	USP48	SF1	HOXD13	FOXK2	SMARCA5	SETD3	ABCB7	SYNPR	CSMD1	DYRK3	CLCN3	USP48	SMARCA5	SYNPR	TMEM128
	SIM2	CARTPT	BRD4	C1GALT1	EIF2C2	AP2M1	ST3GAL3	EIF2C2	EDA	EDG1	PLCL2	IL10	PKP4	LMBR1L	DLG5	EIF2C2	PLCL2	NFKBIA
	GLRB	KPNA3		UCP3		EN2	NTN4	FRAP1	CCNE1	DYNLL2	PCAF	SLC25A4	LPHN3	EDG1	REV1	FRAP1	PCAF	LRRC4
	REXO2	ACVR2B		INOC1		PLAU	ITPR2	FZD8	GPR63	AKAP1	MAP3K10	LRFN4	NIPBL	CNTFR	CHST2	FZD8	MAP3K10	SMARCB1
	BTG3	CSNK2A2		NPTN		STMN1	VIL2	TRIB2	WEE1	ALS2CR2	CD163	PPARGC1B	CCNT2	ATP13A2	CCNK	TRIB2	CD163	JAG2
	HSF2	TITF1		PRKAG2		MYCN	PTPN9	MTMR3	SLC6A4	USP47	RNF34	PYGO2		MATN3	ARID4A	MTMR3	RNF34	EIF3S10
	MDGA1	BRSK1		ATP6AP2		SLC39A5	ZFP36L1	INSM1	BFAR	RNF44	NPTN	IGF1R		TAF5	SEMA3A	INSM1	NPTN	SFRP2
	UBTD2	C9orf41		CHD9		GRB7	MAP2K1		RBM6	NOG	FAM73B	CEP164		TCF7	GNAI2	TMEM55A	FAM73B	XPO7
	TSHZ3	TAOK3		SYNJ1		DNAJC13	FYN		COPS2	MED12L	SLITRK2	CRTAP		GAL3ST3	ACTC1	SETD3	SLITRK2	C11orf58
	C7orf42	CCDC95		WNT10B		RSF1	SLC25A1		HSPG2	COL2A1	DYNC1LI2	HAS2		NEFM	PRICKLE1	EDA	DYNC1LI2	KLHDC2
	HMBOX1			ALS2CR2		ZHX3	BAI3		CHEK1	ST8SIA3	CDKN2AIP	SMAP1		PTPRD	PPARGC1B	CCNE1	CDKN2AIP	THRAP1
	CLIP3			NOG		ZIC3	REV1		CHORDC1	IBRDC1	MAMDC2	EIF4EBP1		PER1	ESCO1	GPR63	MAMDC2	GRM8
	UBE2Z			PLAA		NPAS4	SLC18A3		DLL1	KIAA0082	PAWR	SLC37A4		CSK	FAM43A	WEE1	PAWR	JAK2
				PNPLA6			PLSCR3		EPHA1	TMEM9B	NR6A1	SLCO5A1		MAPK7	MICAL1	SLC6A4	NR6A1	C14orf121
				LBR			FAM5B		PEX13	PDIA3	DOCK7	PURG		ALS2CR2	PAWR	BFAR	DOCK7	SSH2
				MED12L			ZIC2		FRMPD1	GLRX5	EIF4A2	LRRN3		MTMR14	COL13A1	RBM6	EIF4A2	BAT2
				IBRDC1			RAB23		SESN1	UCP3	KIAA0195	P4HA2		SUV420H2	AP2A1	COPS2	KIAA0195	ZBTB22
				ABCB7			UCK2		AP2A1	SFRS2IP	CARD11	DNAJC1		YBX2	KCNJ3	HSPG2	CARD11	RPL35A
				KIAA1324L			SDC2		SPRYD3	TMSB10	ARSJ	CHN2		ABCB9	GLDC	CHEK1	ARSJ	DCUN1D3
				HSP90B1			ZHX2		CUL2	C1GALT1	KLHL5	A2BP1		DCUN1D5	PRLR	CHORDC1	KLHL5	BRD7
				CCKBR			FAM81A		SLC20A2	SKP1A	LRRN1	FAM96A		NFXL1	NCOR2	DLL1	LRRN1	ZFPM2
				DNMT1			SLC10A3		PNPLA6	YPEL3	ATP2A2	PKN2		DUSP16	CHST1	EPHA1	ATP2A2	SIAH1
				PDIA3			PLCB4		G0S2	KIAA1324L	BAI3	MLSTD1		GRIA3	SLC7A10	PEX13	BAI3	MYCN
				EP300			RYK		VAMP8	CCKBR	PCGF2	PBX3		CCT3	DLL4	FRMPD1	PCGF2	KIAA1967
				ST8SIA3			STK19		IL1RAPL1	SIRT7	TOM1L1			NEK4	LRRC8D	SESN1	TOM1L1	YY1
				CAND1			GPC3		TBPL1	HSP90B1	RLF			SLC12A6	IHPK3	AP2A1	RLF	ACTG1
				EDG1			RNF130		ZMYM2	DNMT1	SEC24C			ZSCAN21	NAGPA	SPRYD3	SEC24C	NDUFAB1
				COL2A1			PPP1R12C		CLDN12	DOCK6	PAM			CITED4	SPEN	CUL2	PAM
				AKAP1			FBXW11		TSPYL2	RAB34	KIAA0802			RAB6IP1	C9orf86	SLC20A2	KIAA0802
				GTF2H1			FOXF2		SPTBN2	EP300	SIX2			STX5	YTHDC1	PNPLA6	SIX2
				SFRS2IP			YIPF4		PTH	ATP6AP2	PKNOX2			RAP1A	DDIT4	G0S2	PKNOX2
				DYRK1B			NPTX2		HSPA4L	MAF1	NSMAF			CD164L2	JAG2	VAMP8	NSMAF
				DOCK6			CELSR2		CAPZA2	DYRK1B	ANKRD15			H2AFX	PGM1	IL1RAPL1	ANKRD15
				ARFGEF1			HBEGF		STK19	HAS3	DHX57			ZER1	MAP3K5	TBPL1	DHX57
				RAB34			TSC22D3		ZNF622	CHD9	TBPL1			FREM2	GNAO1	ZMYM2	TBPL1
				MAF1			SRCRB4D		CDCA4	PNPLA6	ATG5				ATP2A2	CLDN12	ATG5
				NME7			ZCCHC3		ATXN2	GAP43	PIAS3				RFXDC1	TSPYL2	PIAS3
				SIRT7			TM9SF4		ZSWIM3	3-Mar	PLEKHJ1				CCDC131	SPTBN2	PLEKHJ1
				MTF1			FAM49B		LRP6	ATP2A2	LMO1				GRM3	PTH	LMO1
				DYNLL2			GPR124		OTX1	NME7	ADM				BCL9	HSPA4L	ADM
				YPEL3			JMJD1C		ARHGDIA	WNT10B	FOXP1				MAP3K12	CAPZA2	FOXP1
				GLRX5			FRAP1		RASGEF1B	ROBO1	HOXB5				SAP30	STK19	HOXB5
				TMSB10			ITPR1		PIB5PA	C5orf30	PDIA6				HERC2	ZNF622	PDIA6
				TNRC6A			ARHGAP24		SFRS16	PLAA	LEMD3				MKRN3	CDCA4	LEMD3
				SFRS11			TMEM169		CHPT1	RMND5A	RTF1				LHX8	ATXN2	RTF1
							HOXA5		MYB	PRKAG2					ADRB1	ZSWIM3	SNX5
							FOXO3A		ZNF423	NPTN					ASB3	LRP6	CSMD1
							TBX1		SPSB4	INOC1					CPSF6	OTX1	IL10
							ARSJ		MAP2K1	KLF4					CADPS	ARHGDIA	SLC25A4
							GIT2		ARMCX2	FAM104A					NFIB	RASGEF1B	LRFN4
							COL13A1		BMX	WDR20					C1orf164	PIB5PA	PPARGC1B
							SNX13		TBP						GRK5	SFRS16	PYGO2
							HBP1		TFAP2D						ZFYVE26	CHPT1	IGF1R
							EVI5L		C17orf59						TNXB	MYB	CEP164
							TBC1D22A		CCDC28A						NEUROD6	ZNF423	CRTAP
							VAMP8		KCNN4						LGI1	SPSB4	HAS2
									KIF21A						IL1A	MAP2K1	SMAP1
									SCOC						BECN1	ARMCX2	EIF4EBP1
									CDC42EP2						EED	BMX	SLC37A4
									KBTBD2						KCTD5	TBP	SLCO5A1
									TMEM87A						LMBR1L	TFAP2D	PURG
									KLC4						BCOR	C17orf59	LRRN3
									TSPAN5						NEUROD1	CCDC28A	P4HA2
									NLGN1						TIA1	KCNN4	DNAJC1
									OTUB1						SMARCD2	KIF21A	CHN2
									HIRA						SUPT3H	SCOC	A2BP1
									IBRDC1						JMJD1A	CDC42EP2	FAM96A
									YWHAQ						SLC41A2	KBTBD2	PKN2
									ENAH						RRAD	TMEM87A	MLSTD1
									WNT7A						UBE2I	KLC4	PBX3
									PCDH9						SOCS1	TSPAN5	DBT
									PIAS1						RAB32	NLGN1	DYRK3
									ZCCHC5						MYBL2	OTUB1	PKP4
									RSBN1						TMEFF1	HIRA	LPHN3
									HIGD1A						ANKRA2	IBRDC1	NIPBL
									TMEM87B						RAB38	YWHAQ	CCNT2
															RHEBL1	ENAH	AARS
															NHLH2	WNT7A	CLCN3
															ZNRF1	PCDH9	LMBR1L
															TNRC6A	PIAS1	EDG1
															ARL6IP6	ZCCHC5	CNTFR
															C7orf43	RSBN1	ATP13A2
															TMEM121	HIGD1A	MATN3
																TMEM87B	TAF5
																MEOX2	TCF7
																ABCB7	GAL3ST3
																EDG1	NEFM
																DYNLL2	PTPRD
																AKAP1	PER1
																ALS2CR2	CSK
																USP47	MAPK7
																RNF44	ALS2CR2
																NOG	MTMR14
																MED12L	SUV420H2
																COL2A1	YBX2
																ST8SIA3	ABCB9
																IBRDC1	DCUN1D5
																KIAA0082	NFXL1
																TMEM9B	DUSP16
																PDIA3	GRIA3
																GLRX5	CCT3
																UCP3	NEK4
																SFRS2IP	SLC12A6
																TMSB10	ZSCAN21
																C1GALT1	CITED4
																SKP1A	RAB6IP1
																YPEL3	STX5
																KIAA1324L	RAP1A
																CCKBR	CD164L2
																SIRT7	H2AFX
																HSP90B1	ZER1
																DNMT1	FREM2
																DOCK6
																RAB34
																EP300
																ATP6AP2
																MAF1
																DYRK1B
																HAS3
																CHD9
																PNPLA6
																GAP43
																3-Mar
																ATP2A2
																NME7
																WNT10B
																ROBO1
																C5orf30
																PLAA
																RMND5A
																PRKAG2
																NPTN
																INOC1
																KLF4
																FAM104A
																WDR20
